# Supplementary material for: Revised Species Delimitation in the Giant Water Lily Genus Victoria (Nymphaeaceae) Confirms a New Species and Has Implications for Its Conservation
Source: Front Plant Sci. 2022 Jul 4;13:883151. doi: 10.3389/fpls.2022.883151 (PMC9289450; doi:10.3389/fpls.2022.883151)
Supplement: Supplementary file 1 [file Table_4.xlsx]

## Sheet: collections
Table S4 Morphological observations from biological collections.
morphospecies	Collector Name	Specimen No	Herbarium	Sheet	Date collected	Barcode	Country	Rim hairs abaxial, Length	Rim hairs, segment size number	Central/mid-leaf hairs abaxial, length	Central/mid-leaf hairs abaxial segment size number	Indument visible on ovary	Ovary hairs and length	Ovary prickles visible	Ovary prickles smoothly tapering	Ovary prickles abruptly tapering	Ovary prickle size 1 (mm)	Ovary prickle size 2 (mm)	Ovary prickle size 3 (mm)	Ovary prickle size 4 (mm)	Ovary prickle size 5 (mm)	Outer tepals abaxial visible	Outer tepals fully visible abaxially	Outer Tepal hairs, length	Outer Tepal hairs, segment size and number	Indument visible on outer tepals abaxial	Outer tepals prickles present abaxial	Outer tepal prickles absent	Outer tepal prickles spacing	Outer tepal prickles covering	Outer tepal prickles partially covering sepals	Outer tepal prickles, % covering	Outer tepal prickle number counted (extrapolated)	Outer tepal prickles smoothly tapering	Outer tepal prickles abruptly tapering	Outer tepal prickle size 1 (mm)	Outer tepal prickle size 2 (mm)	Outer tepal prickle size 3 (mm)	Outer tepal prickle size 4 (mm)	Petals visible on specimen	Innermost tepals white	Innermost tepals dark	Carpellary appendages visible	Upper Carpellary appendages (mm)	Lower Carpellary appendages (mm)	Carpellary appendages rounded at base, free	Carpellary appendages flat at base, attached	Ovules visible, size	Fruit prickles smoothly tapering
amazonica	Adalardo-Oliveira, A.	2645	NY	NA	04/07/1995	NY02269930	Brazil	NA	NA	NA	NA	NA	NA	Y	Y	N	4	7	8	13	NA	N	NA	NA	NA	NA	NA	NA	NA	NA	NA	NA	NA	NA	NA	NA	NA	NA	NA	Y	not visible	not visible	Y	7	10	Y	N	Y ovules 1mm	NA
amazonica	Adalardo-Oliveira, A.	2645	SPF	NA	04/07/1995	SPF00107201	Brazil	NA	NA	NA	NA	NA	NA	NA	NA	NA	NA	NA	NA	NA	NA	N	NA	NA	NA	NA	NA	NA	NA	NA	NA	NA	NA	NA	NA	NA	NA	NA	NA	NA	NA	NA	NA	NA	NA	NA	NA	NA	NA
amazonica	Basil, H. B.	s.n.	NY	NA	--/08/1864	NY02514613	NA	NA	NA	NA	NA	NA	NA	Y	Y	N	NA	NA	NA	NA	NA	N	N	NA	NA	NA	NA	NA	NA	NA	NA	NA	NA	NA	NA	NA	NA	NA	NA	NA	NA	NA	N	NA	NA	NA	NA	NA	NA
amazonica	Black, G. A.	48-2253	IAN	NA	02/01/1948	IAN033014	Brazil	NA	NA	NA	NA	N	NA	Y	Y	N	3	9	14	NA	NA	Y	N 90%	NA	NA	N	Y	NA	NA	Y	N	NA	75, 61 (83, 68)	Y	N	1.5	2	4	NA	Y	not visible	not visible	N	not measurable	not measurable	Y	N	N	NA
amazonica	Black, G. A.	48-2254	IAN	NA	02/01/1948	IAN033015	Brazil	NA	NA	NA	NA	N	NA	Y	Y	N	4.5	6.5	14	NA	NA	N	N	NA	NA	N	Y	NA	NA	Y	N	NA	NA	Y	N	NA	NA	NA	NA	N	NA	NA	Y	not measurable	not measurable	Y	N	N	NA
amazonica	Black, G.A.	48-2223	IAN	NA	01/01/1948	IAN032985	Brazil	NA	NA	NA	NA	NA	NA	NA	NA	NA	NA	NA	NA	NA	NA	NA	NA	NA	NA	NA	NA	NA	NA	NA	NA	NA	NA	NA	NA	NA	NA	NA	NA	NA	NA	NA	NA	NA	NA	NA	NA	NA	NA
amazonica	Black, G.A.	48-2254	NY	NA	02/01/1948	NY02269926	Brazil	NA	NA	NA	NA	N	NA	Y	Y	N	3	9	11	15	NA	Y	N 25%	NA	NA	N	Y	NA	regular to irregular	Y	N	NA	24 (96)	Y	N	2	3	4	NA	N	N	Y	Y	10	10	Y	N	N	NA
amazonica	Black, G.A.	48-2254	US	NA	02/01/1948	US01341602	Brazil	NA	NA	NA	NA	N	NA	Y	Y	N	4	5	6.5	10	11	Y	N 40%	NA	NA	N	Y	NA	regular to irregular	Y	N	NA	40 (100)	Y	N	1	3	4	NA	Y	N	maybe? (brown from drying)	N	NA	NA	NA	NA	N	NA
amazonica	Brogim, R.	4	UPCB	NA	16/12/2017	UPCB0035920	Brazil	NA	NA	NA	NA	NA	NA	NA	NA	NA	NA	NA	NA	NA	NA	NA	NA	NA	NA	NA	NA	NA	NA	NA	NA	NA	NA	NA	NA	NA	NA	NA	NA	NA	NA	NA	NA	NA	NA	NA	NA	NA	NA
amazonica	Davidson, C. Martinelli, G.	10241	NY	sheet 2 of 2	11/06/1980	NY2269908	Brazil	NA	NA	NA	NA	N	NA	Y	Y	N	9	18	20	NA	NA	Y	N 50%	NA	NA	N	Y	NA	regular to irregular	Y	N	NA	36 (72)	Y	N	6	7	8	NA	Y	N	Y	Y	12	15	Y	Y	ovules 1.5mm	NA
amazonica	Davidson, C. Martinelli, G.	10241	NY	sheet 1 of 2	11/06/1980	NY2269909	Brazil	NA	NA	NA	NA	NA	NA	NA	NA	NA	NA	NA	NA	NA	NA	N	N	NA	NA	NA	NA	NA	NA	NA	NA	NA	NA	NA	NA	NA	NA	NA	NA	NA	NA	NA	NA	NA	NA	NA	NA	NA	NA
amazonica	Davidson, C. Martinelli, G.	10241	US	sheet 2 of 2	11/06/1980	US01341603	Brazil	NA	NA	NA	NA	NA	NA	NA	NA	NA	NA	NA	NA	NA	NA	N	N	NA	NA	NA	NA	NA	NA	NA	NA	NA	NA	NA	NA	NA	NA	NA	NA	NA	NA	NA	NA	NA	NA	NA	NA	NA	NA
amazonica	Davidson, C. Martinelli, G.	10241	US	sheet 1 of 2	11/06/1980	US01341604	Brazil	NA	NA	NA	NA	N	NA	Y	Y	N	7	14	16	NA	NA	Y	Y	NA	NA	NA	Y	NA	regular to irregular	Y	N	NA	93	Y	N	4	7	8	NA	Y	N	Y	Y	14	18	NA	NA	N	NA
amazonica	Davidson, C., Martinelli, G.	10241	MO	sheet 1 of 2	11/06/1980	MO1955119	Brazil	0.3-0.9mm	0.1mm, 3-9	0.5mm	0.1mm, 5	NA	NA	NA	NA	NA	NA	NA	NA	NA	NA	NA	NA	NA	NA	NA	NA	NA	NA	NA	NA	NA	NA	NA	NA	NA	NA	NA	NA	NA	NA	NA	NA	NA	NA	NA	NA	NA	NA
amazonica	Davidson, C., Martinelli, G.	10241	MO	sheet 2 of 2	11/06/1980	MO1955120	Brazil	NA	NA	NA	NA	N	NA	Y	Y	N	6	8	15	18	NA	Y	Y	Y 0.2-0.4mm	0.1mm, 2-4	N	Y	NA	regular to irregular	Y	N	NA	145	Y	N	4	9	10	NA	Y	N	Y	Y	12	15	NA	NA	ovules 1mm	NA
amazonica	Davidson, C., Martinelli, G.	10241	RB	NA	11/06/1980	RB00267600	Brazil	duplicate above	duplicate above	duplicate above	duplicate above	NA	NA	NA	NA	NA	NA	NA	NA	NA	NA	NA	NA	NA	NA	NA	NA	NA	NA	NA	NA	NA	NA	NA	NA	NA	NA	NA	NA	NA	NA	NA	NA	NA	NA	NA	NA	NA	NA
amazonica	Ferreira, C. A.	5123	NY	NA	01/10/1984	NY00868931	Brazil	NA	NA	NA	NA	NA	NA	NA	NA	NA	NA	NA	NA	NA	NA	N	NA	NA	NA	NA	NA	NA	NA	NA	NA	NA	NA	NA	NA	NA	NA	NA	NA	N	NA	NA	N	NA	NA	NA	NA	N	NA
amazonica	Ferreira, C. A.	5123	NY	NA	01/10/1984	NY00868932	Brazil	NA	NA	NA	NA	NA	NA	N	NA	NA	NA	NA	NA	NA	NA	N	NA	NA	NA	NA	NA	NA	NA	NA	NA	NA	NA	NA	NA	NA	NA	NA	NA	Y	not visible	not visible	N	NA	NA	NA	NA	N	NA
amazonica	Gentry, A., Daly, D.	18351	MO	NA	15/03/1977	MO492468	Peru	0.5-0.6mm	0.1, 5-6	not visible	not visible	N	NA	Y	Y	N	2	4	9	11	NA	Y	N 30%	NA	NA	N	Y	NA	NA	Y	N	NA	40 (133)	Y	N	3	6	NA	NA	Y	Y	N	Y	10	14	Y	N	ovules 1-1.5mm	NA
amazonica	Gentry, A., Jarmillo N.	22133	MO	NA	22/05/1978	MO492466	Peru	not visible	not visible	not visible	not visible	N	NA	Y	Y	N	5	7	10	NA	NA	Y	N edge only	NA	NA	N	Y	NA	not visible	Y	N	NA	NA	Y	N	2	6	8	NA	Y	not visible	not visible	N	NA	NA	NA	NA	NA	NA
amazonica	Jangoux, J., Riberio, B.G.S.	1647	NY	NA	6-8/08/1981	NY02269913	Brazil	NA	NA	NA	NA	NA	NA	NA	NA	NA	NA	NA	NA	NA	NA	NA	NA	NA	NA	NA	NA	NA	NA	NA	NA	NA	NA	NA	NA	NA	NA	NA	NA	NA	NA	NA	NA	NA	NA	NA	NA	NA	NA
amazonica	Jangoux, J., Riberio, B.G.S.	1647	NY	NA	6-8/08/1981	NY02269944	Brazil	NA	NA	NA	NA	N	NA	Y	Y	N	5	7.5	11	NA	NA	N	N	NA	NA	N	NA	NA	NA	NA	NA	NA	NA	NA	NA	NA	NA	NA	NA	Y	brown from drying	brown from drying	N (beetles only)	NA	NA	NA	NA	NA	NA
amazonica	Lima, C.T	503	HUEFS	NA	17/07/2011	HUEFS202883	Brazil	NA	NA	NA	NA	N	NA	Y	Y	N	2	7	15	17	NA	Y	N80%	NA	NA	N	Y	NA	regular to irregular	Y	N	NA	140 (175)	Y	N	3	7	14	NA	Y	brown from drying/scan dark	brown from drying/scan too dark	Y	9	9	Y	N	N too dark	NA
amazonica	Maas, P.J.M., Koek-N, J., Lall, H., ter Welle, B.J.H., Westra, L.Y.	7727	K	NA	27/09/1988	NA	Guyana	0.5-0.8mm dense, pigmented	0.1mm, 3-8	not visible	not visible	NA	NA	NA	NA	NA	NA	NA	NA	NA	NA	NA	NA	NA	NA	NA	NA	NA	NA	NA	NA	NA	NA	NA	NA	NA	NA	NA	NA	NA	NA	NA	NA	NA	NA	NA	NA	NA	NA
amazonica	Maas, P.J.M., Koek-N, J., Lall, H., ter Welle, B.J.H., Westra, L.Y.	7727	MO	NA	27/09/1988	MO1955117	Guyana	0.5mm	0.1, 4-6	not visible	not visible	NA	NA	NA	NA	NA	NA	NA	NA	NA	NA	NA	NA	NA	NA	NA	NA	NA	NA	NA	NA	NA	NA	NA	NA	NA	NA	NA	NA	NA	NA	NA	NA	NA	NA	NA	NA	NA	NA
amazonica	Markgraf	3873	RB	NA	25/12/1938	RB00267606	Brazil	NA	NA	NA	NA	N	NA	Y	Y	N	4	6.5	15	NA	NA	N	N	NA	NA	N	Y	NA	NA	NA	NA	NA	NA	NA	NA	NA	NA	NA	NA	N	NA	NA	N	NA	NA	NA	NA	N	NA
amazonica	Martinelli, G.	6945	RB	NA	08/06/1980	RB00267593	Brazil	NA	NA	NA	NA	N	NA	Y	Y	N	3	10	13	NA	NA	Y	N 10%	NA	NA	N	Y	NA	NA	NA	NA	NA	NA	Y	N	NA	NA	NA	NA	Y	NA	NA	Y	13	14	Y	N	NA	NA
amazonica	Martinelli, G., Moraes, M.A., Benevides, P., Forzza, R.C., Nadruz, M., Gallucci, S., Costa, D.	17700	RB	NA	28/03/2012	RB00743732	Brazil	NA	NA	NA	NA	N	NA	Y	Y	N	4	6	12	15	NA	Y	N 15%	NA	NA	N	Y	NA	NA	Y	N	NA	32 (213)	Y	N	2	2.5	4	NA	Y	not visible	not visible	Y	9	11	Y	N	N	NA
amazonica	Plowman, T., Lockwood, T., Kennedy, H., R.E. Schultes, R.E.	2313	K	sheet 1 of 3	28/01 - 07/02/1969	none	Colombia	NA	NA	NA	NA	N	NA	Y	Y	N	4	6	14	16	NA	N	NA	NA	NA	N	NA	NA	NA	NA	NA	NA	NA	NA	NA	NA	NA	NA	NA	Y	not visible	NA	N	NA	NA	NA	NA	NA	NA
amazonica	Plowman, T., Lockwood, T., Kennedy, H., R.E. Schultes, R.E.	2313	K	sheet 2 of 3	28/01 - 07/02/1969	none	Colombia	not visible	NA	NA	NA	NA	NA	NA	NA	NA	NA	NA	NA	NA	NA	NA	NA	NA	NA	NA	NA	NA	NA	NA	NA	NA	NA	NA	NA	NA	NA	NA	NA	NA	NA	NA	NA	NA	NA	NA	NA	NA	NA
amazonica	Plowman, T., Lockwood, T., Kennedy, H., R.E. Schultes, R.E.	2313	K	sheet 3 of 3	28/01 - 07/02/1969	none	Colombia	not visible	NA	NA	NA	NA	NA	NA	NA	NA	NA	NA	NA	NA	NA	NA	NA	NA	NA	NA	NA	NA	NA	NA	NA	NA	NA	NA	NA	NA	NA	NA	NA	NA	NA	NA	NA	NA	NA	NA	NA	NA	NA
amazonica	Prance, G. T.	22745	K	NA	25/09/74	K000837777	Brazil	0.5-12mm young leaf	0.1-0.2, up to 12	not visible	not visible	N	NA	Y	Y	N	2	6	7	12	NA	Y	N 15%	NA	NA	N	Y	N	regular to irregular	Y	N	NA	15 (100)	Y	N	2	3	4	NA	Y	N	Y	Y	7	10	Y	N	ovules 1-1.2mm	NA
amazonica	Prance, G.T	22745	US	NA	25/09/1974	US01341606	Brazil	NA	NA	NA	NA	N	NA	Y	Y	N	7	10	12	NA	NA	Y	Y	NA	NA	N	Y	NA	regular to irregular	Y	N	NA	depilated	Y	N	2	3	5.5	NA	N	NA	NA	N	NA	NA	NA	NA	N	NA
amazonica	Prance, G.T.	22745	NY	NA	25/09/1974	NY02269910	Brazil	NA	NA	NA	NA	N	NA	Y	Y	N	2	5.5	9	NA	NA	Y	Y	NA	NA	N	Y	NA	regullar to irregular	Y	N	NA	100	Y	N	1.5	3	4.5	NA	Y	N	Y	Y	8	8.5	Y	N	ovules 1mm	NA
amazonica	Prance, G.T.	22745	NY	NA	25/09/1974	NY02269911	Brazil	NA	NA	NA	NA	NA	NA	NA	NA	NA	NA	NA	NA	NA	NA	NA	NA	NA	NA	NA	NA	NA	NA	NA	NA	NA	NA	NA	NA	NA	NA	NA	NA	NA	NA	NA	NA	NA	NA	NA	NA	NA	NA
amazonica	Prance, G.T.	22745	NY	NA	25/09/1974	NY02269928	Brazil	NA	NA	NA	NA	NA	NA	NA	NA	NA	NA	NA	NA	NA	NA	NA	NA	NA	NA	NA	NA	NA	NA	NA	NA	NA	NA	NA	NA	NA	NA	NA	NA	NA	NA	NA	NA	NA	NA	NA	NA	NA	NA
amazonica	Prance, G.T., Ramos, J.F., Farias, L.G.	8016	NY	NA	29/10/1968	NY02269914	Brazil	NA	NA	NA	NA	N	NA	Y	Y	N	2	9	11	NA	NA	Y	N 20%	NA	NA	N	Y	NA	regular to irregular	Y	N	NA	25 (125)	Y	N	2.5	3	5	NA	N	NA	NA	N	NA	NA	NA	NA	NA	NA
amazonica	Quinet, A., Saraiva, B., Firmeza, T.	1582	K	NA	15/02/2009	RB00597189 (same as Kew specimen but different sheet)	Brazil	NA	NA	NA	NA	N	NA	Y	Y	N	2	3	4	6	NA	Y	N 45%	NA	NA	N	Y	NA	regular to irregular	Y	N	NA	40 (89)	Y	N	1	2	4	NA	Y	N	Y	Y	8	9	Y	N	N	Y
amazonica	Quinet, A., Saraiva, B., Firmeza, T.	1582	K	NA	15/02/2009	RB00597189	Brazil	not visible	not visible	0.3-0.5mm	0.1mm, 3-5	N	fruit: 0.5-0.8, 0.1-0.2, 3-9	Y	Y	N	2	3	4	6	NA	Y	N 45%	NA	NA	N	Y	NA	NA	Y	N	NA	45 (100)	Y	N	1	2	3	NA	Y	N	Y	Y	8	9	Y	N	NA	Y
amazonica	Quinet, A., Saraiva, B., Firmeza, T.	1582	SPF	NA	15/02/2009	SPF00206517	Brazil	NA	NA	NA	NA	N	NA	Y	Y	N	3	6	8.5	9	NA	Y	N 30%	NA	NA	N	Y	NA	regular to irregular	Y	N	NA	30 (90)	Y	N	4	4.5	5	NA	Y	N	Y	Y	9	10	Y	N	N	Y
amazonica	Ritter, N., Crow, G., Crow, C.	4170	MO	NA	09/07/1997	MO2943011	Bolivia	0.6-0.8mm	0.1mm, 5-8	0.3-0.5mm	0.1mm, 3-5	?	0.1mm long	Y	Y	N	3	7	10	NA	NA	Y	N 40%	NA	NA	N	Y	NA	regular to irregular	Y	N	NA	37 (92)	Y	N	3	4	7	NA	Y	N	Y	Y	12	14	not visible	not visible	ovules 1 - 1.5mm	NA
amazonica	s.n.	s.n.	P	NA	s.d.	P02000882	NA	NA	NA	NA	NA	NA	NA	NA	NA	NA	NA	NA	NA	NA	NA	NA	NA	NA	NA	NA	NA	NA	NA	NA	NA	NA	NA	NA	NA	NA	NA	NA	NA	NA	NA	NA	NA	NA	NA	NA	NA	NA	NA
amazonica	Schomburgk, R.H.	s.n. Schomburgk	K	NA	1837	K000075416	Guyana	dense, not measured	not measured	sparse	sparse	NA	NA	NA	NA	NA	NA	NA	NA	NA	NA	NA	NA	NA	NA	NA	NA	NA	NA	NA	NA	NA	NA	NA	NA	NA	NA	NA	NA	NA	NA	NA	NA	NA	NA	NA	NA	NA	NA
amazonica	Schomburgk, R.H.	s.n. Schomburgk	K	NA	s.d	K000075417	Guyana	not visible	NA	NA	NA	NA	NA	NA	NA	NA	NA	NA	NA	NA	NA	NA	NA	NA	NA	NA	NA	NA	NA	NA	NA	NA	NA	NA	NA	NA	NA	NA	NA	NA	NA	NA	NA	NA	NA	NA	NA	NA	NA
amazonica	Schomburgk, R.H.	s.n. Schomburgk	K	NA	s.d.	K000075418	Guyana	not visible	NA	NA	NA	NA	NA	NA	NA	NA	NA	NA	NA	NA	NA	NA	NA	NA	NA	NA	NA	NA	NA	NA	NA	NA	NA	NA	NA	NA	NA	NA	NA	NA	NA	NA	NA	NA	NA	NA	NA	NA	NA
amazonica	Spruce, R.	441	K	NA	--/10/1849	none	Brazil	not visible	NA	not visible	not visible	N	NA	Y	Y	N	3	6	15	17	NA	Y	N 30%	NA	NA	N	Y	NA	regular to irregular	Y	N	NA	40 (133)	Y	N	6	8	NA	NA	N	NA	NA	N	NA	NA	NA	NA	NA	NA
amazonica	Spruce, R.	441	K	NA	--/11/1849	none	Brazil	not visible	NA	NA	NA	N	NA	Y	Y	N	4	6	12	16	NA	Y	N (L.S. only)	NA	NA	N	y	NA	not visible	Y	N	NA	na	Y	N	2	3	destroyed	NA	N, destroyed	not visible	not visible	Y	12	15	Y	N	ovules 1mm	NA
amazonica	Spruce, R.	s.n.	NY	NA	--/04/1850	NY02269927	Brazil	NA	NA	NA	NA	N	NA	Y	Y	N	4	13.5	16.5	NA	NA	Y	Y	NA	NA	N	Y	NA	regular to irregular	Y	N	NA	56, 53, 75, 112	Y	N	2	4	9	NA	N	NA	NA	N	NA	NA	NA	NA	NA	NA
amazonica	Spruce, R.	s.n.	P	NA	s.d.	P06792967	Brazil	NA	NA	NA	NA	N	NA	Y	Y	N	not measurable	NA	NA	NA	NA	N	N	NA	NA	N	NA	NA	NA	Y	N	NA	NA	Y	N	not measurable	NA	NA	NA	N	N	Y	N	shorter/not measurable	longer/not measurable	Y	NA	N	NA
amazonica	Spruce, R.	s.n.	P	NA	1849	P06792964	Brazil	NA	NA	NA	NA	NA	NA	NA	NA	NA	NA	NA	NA	NA	NA	NA	NA	NA	NA	NA	NA	NA	NA	NA	NA	NA	NA	NA	NA	NA	NA	NA	NA	NA	NA	NA	NA	NA	NA	NA	NA	NA	NA
amazonica	Spruce, R.	s.n.	P	NA	s.d.	P06792966	Brazil	NA	NA	NA	NA	N	NA	Y	Y	N	not measurable	NA	NA	NA	NA	Y	Y	NA	NA	N	Y	NA	regular	Y	N	NA	167	Y	N	not measurable	NA	NA	NA	N	brown from drying	brown from drying	Y	shorter/not measurable	longer/not measurable	Y	N	Y not measurable	NA
amazonica	Spruce, R.	s.n.	P	NA	s.d.	P06792961	Brazil	NA	NA	NA	NA	N	NA	Y	Y	N	not measurable	NA	NA	NA	NA	Y	Y	NA	NA	N	Y	NA	regular to irregular	Y	NA	NA	138	Y	N	not measurable	NA	NA	NA	Y	not visible	NA	N	NA	NA	NA	NA	N	NA
amazonica	Spruce, R.	s.n. Spruce	K	NA	s.d.	none	Brazil	0.1 - 1mm	0.2, up to c.10	not visible	not visible	Y	NA	Y	Y	N	2	4	8	10	NA	Y, partial	N, 5%	NA	NA	N	Y	N	regular to irregular	Y	N	NA	60 (300)	Y	N	2	6	8	NA	Y	N	Y	Y	8	12	Y	N	ovules 0.5mm	NA
amazonica	Spruce, R.	s.n. Spruce	K	NA	s.d.	K000075419	Brazil	not visible	NA	NA	NA	N	NA	Y	Y	N	4	10	15	NA	NA	Y	N	NA	NA	N	Y	NA	NA	Y	N	NA	na	Y	N	4	6	NA	NA	Y	N	Y	Y	10	12	Y	N	ovules 1mm	NA
amazonica	Steward, W. C. and Ramos, J.F.	P20211	K	NA	05/02/1974	K000837775	Brazil	0.3-0.6mm	0.1, up to 8	0.5	0.1mm, 3-6	Y	Y, 0.5, 0.1, 2-4	Y	Y	N	2	3	10	11	NA	Y	N 20%	NA	NA	N	Y	N	regular to irregular	Y	N	NA	30 (150)	Y	N	3	4	0	0	Y	N	Y	Y	8	12	Y	N	N	NA
amazonica	Steward, W. C. and Ramos, J.F.	P20211	NY	NA	05/02/1974	US01341605	Brazil	NA	NA	NA	NA	N	NA	Y	Y	N	2	7	13	14	NA	N	N	NA	NA	N	NA	NA	NA	NA	NA	NA	NA	NA	NA	NA	NA	NA	NA	Y	N	Y	Y	10	10	Y	N	N	NA
amazonica	Steward, W. C. and Ramos, J.F.	P20211	NY	NA	05/02/1974	NY02269912	Brazil	NA	NA	NA	NA	N	NA	Y	Y	N	5	6	10	12	NA	Y	Y	NA	NA	N	Y	NA	regular to irregular	Y	N	NA	85	Y	N	3	4	6	NA	Y	N	Y	N	NA	NA	NA	NA	N	NA
amazonica	Steward, W. C. and Ramos, J.F.	P20211	NY	NA	05/02/1974	NY02269929	Brazil	NA	NA	NA	NA	NA	NA	NA	NA	NA	NA	NA	NA	NA	NA	NA	NA	NA	NA	NA	NA	NA	NA	NA	NA	NA	NA	NA	NA	NA	NA	NA	NA	NA	NA	NA	NA	NA	NA	NA	NA	NA	NA
amazonica	Tsugaru, S. & Yotaro Sano	B-1069	NY	NA	15/08/1987	NY02269916	Brazil	NA	NA	NA	NA	N	NA	Y	Y	N	5	8	17	NA	NA	N	NA	NA	NA	N	NA	NA	NA	NA	NA	NA	NA	NA	NA	NA	NA	NA	NA	N	NA	NA	N	NA	NA	NA	NA	N	NA
amazonica	Tsugaru, S. & Yotaro Sano	B-769	NY	NA	08/08/1987	NY02269915	Brazil	NA	NA	NA	NA	NA	NA	NA	NA	NA	NA	NA	NA	NA	NA	NA	NA	NA	NA	NA	NA	NA	NA	NA	NA	NA	NA	NA	NA	NA	NA	NA	NA	NA	NA	NA	NA	NA	NA	NA	NA	NA	NA
amazonica	Tsugaru, Shunsuke & Yotaro Sano	B-769	MO	sheet 1 of 2	08/08/1987	MO1955115	Brazil	0.6-0.7mm	0.1-0.2, 5-8	0.5mm	0.1mm, 3-5	N	Y, 0.1-0.2mm, 0.1, 1-2	Y	Y	N	3	6	9	NA	NA	Y	Y	NA	NA	N	Y	NA	NA	Y	N	NA	76	Y	N	2	3	NA	NA	Y	brown from drying	brown from drying	Y	6	8	Y	N	N	NA
amazonica	Tsugaru, Shunsuke & Yotaro Sano	B-769	MO	sheet 2 of 2	08/08/1987	MO1955116	Brazil	duplicate above	duplicate above	duplicate above	duplicate above	NA	NA	NA	NA	NA	NA	NA	NA	NA	NA	NA	NA	NA	NA	NA	NA	NA	NA	NA	NA	NA	NA	NA	NA	NA	NA	NA	NA	NA	NA	NA	NA	NA	NA	NA	NA	NA	NA
amazonica	Vasquez, R., Grandez, C., Jaramillo, N.	3684	MO	sheet 1 of 2	21/12/1982	MO492467	Peru	0.5-1mm	0.1-0.2mm, 5-10	0.5-0.8mm	0.1-0.2mm, 3-5	NA	NA	NA	NA	NA	NA	NA	NA	NA	NA	NA	NA	NA	NA	NA	NA	NA	NA	NA	NA	NA	NA	NA	NA	NA	NA	NA	NA	NA	NA	NA	NA	NA	NA	NA	NA	NA	NA
amazonica	Vasquez, R., Grandez, C., Jaramillo, N.	3684	MO	sheet 2 of 2	21/12/1982	MO492465	Peru	NA	NA	NA	NA	N	Y, 0.5mm, 0.1, 5	Y	Y	N	2	3	9	12	18	Y	N edge only	NA	NA	N	Y	NA	not visible	Y	N	NA	NA	Y	N	6	8	NA	NA	Y	N	Y	N	NA	NA	NA	NA	ovules 1.2-1.5mm, inner petals dark	NA
amazonica	Vaughan, G.	61	K	NA	1898	K000837776	Brazil	not visible	NA	NA	NA	NA	NA	NA	NA	NA	NA	NA	NA	NA	NA	NA	NA	NA	NA	NA	NA	NA	NA	NA	NA	NA	NA	NA	NA	NA	NA	NA	NA	Y	N	N	Y	6	8	NA	NA	NA	NA
amazonica	Vaughan, G.	61	K	NA	1898	K000630003	Brazil	0.3-0.5mm, dense	0.05-0.1mm, 3-5	0.5mm	0.1mm, 3-5	NA	Y, 0.1-0.5, 0.05-0.1, 3-5	Y	Y	N	1	2	3	8	NA	Y	Y	at base	NA	NA	Y	NA	regular to irregular	Y	N	NA	250	Y	N	1	2	3	0	Y	N	Y	Y	6	8	Y	N	N	NA
boliviana	Beck, S.	15173	LPB/K	NA	29/03/1988	none	Bolivia	absent	NA	NA	NA	N	NA	Y	N	Y	1	4	7	15	NA	Y	N, bases obscured	NA	NA	N	Y	NA	irregular	N	Y	1%	1	N	Y	1	NA	NA	NA	NA	N, pink	N, pink	Y, but deformed second-night	12	11	intermediate	intermediate	N	NA
boliviana	Bridges, T.	s.n. Bridges	K	NA	6 or 7/1845	none	Bolivia	NA	NA	NA	NA	NA	NA	Y	N	Y	1	5	10	NA	NA	Y	N 80%	NA	NA	N	N	Y	NA	NA	NA	NA	NA	NA	NA	NA	NA	NA	NA	Y	brown from drying	brown from drying	Y	16	12	NA	NA	N	NA
boliviana	Magdalena, C., Melgar, D.G., Salazar, C.D., Alvarez, C., Gutierrez, G., Arias, J.	154	Herbario German Coimbra Sanz Jardin Botanica Municipal	NA	08/05/2019	005602	Bolivia	NA	NA	NA	NA	N	NA	Y	N	Y	2	4	6	NA	NA	Y	Y	NA	NA	N	N	Y	NA	NA	NA	NA	NA	NA	NA	NA	NA	NA	NA	NA	NA	NA	N	NA	NA	NA	NA	NA	NA
boliviana	Magdalena, C., Melgar, D.G., Salazar, C.D., Alvarez, C., Gutierrez, G., Arias, J.	154	Herbario German Coimbra Sanz Jardin Botanica Municipal	NA	08/05/2019	005601	Bolivia	NA	NA	NA	NA	NA	NA	NA	NA	NA	NA	NA	NA	NA	NA	NA	NA	NA	NA	NA	NA	NA	NA	NA	NA	NA	NA	NA	NA	NA	NA	NA	NA	NA	NA	NA	NA	NA	NA	NA	NA	NA	NA
boliviana	Magdalena, C., Melgar, D.G., Salazar, C.D., Alvarez, C., Gutierrez, G., Arias, J.	155	Herbario German Coimbra Sanz Jardin Botanica Municipal	NA	09/05/2019	005603	Bolivia	NA	NA	NA	NA	NA	NA	NA	NA	NA	NA	NA	NA	NA	NA	NA	NA	NA	NA	NA	NA	NA	NA	NA	NA	NA	NA	NA	NA	NA	NA	NA	NA	NA	NA	NA	NA	NA	NA	NA	NA	NA	NA
boliviana	Magdalena, C., Melgar, D.G., Salazar, C.D., Alvarez, C., Gutierrez, G., Arias, J.	155	Herbario German Coimbra Sanz Jardin Botanica Municipal	NA	09/05/2019	005604	Bolivia	NA	NA	NA	NA	N	NA	Y	N	Y	4.5	8	9	NA	NA	Y	Y	NA	NA	N	Y	NA	irregular	N	Y	1%	4	N	Y	2.5	3	5	NA	Y	N	N, pink	Y	24	16.5	N	Y	Y, ovules 2 - 2.5mm	NA
cruziana	Balansa, R.	523	K	NA	17/03/1875	none	Paraguay	1-1.5mm	0.1-0.2, 10+	1-1.5mm	0.1-0.3, 6-10	Y	Y, 1mm, 0.1 c.10	Y	N	Y	2	4	10	NA	NA	Y	Y	1mm	0.1, c.10	Y	Y	NA	NA	N	Y	25	50	N	Y	1	2	4	NA	Y	not visible	not visible	N	NA	NA	NA	NA	NA	NA
cruziana	Balansa, R.	523	P	NA	17/03/1875	P02000881	Paraguay	NA	NA	NA	NA	Y	NA	Y	N	Y	not measurable	NA	NA	NA	NA	N	N	NA	NA	Y	NA	NA	NA	NA	NA	NA	NA	NA	Y	NA	NA	NA	NA	Y	Y	N	Y	(not measurable) shorter	(not measurable) mm longer	N	Y	NA	NA
cruziana	Burkart, A., Toncosco, N.S., Guaglianone, E.R., Palacios, R.A.	26963	SI	NA	10/04/1968	41136	Argentina	NA	NA	NA	NA	Y	NA	Y	N	Y	1.2	3	8	13	18	Y	N 80%	NA	NA	Y	Y	NA	irregular	N	Y	25, 13	70	N	Y	1	2	3	5	Y	Y	N	Y	15	21	N	Y	Y, ovules 1.1 - 1.2mm	NA
cruziana	Burkart, A., Troncoso, N.S., Guaglianone, E.R., Palacios, R.A.	26963	SI	NA	10/04/1968	41137	Argentina	NA	NA	NA	NA	Y	NA	Y	N	Y	2	3	6	7.5	8	Y	Y	NA	NA	Y	Y	NA	NA	N	Y	20	75	N	Y	1	2	5	7	Y	Y	N	Y	20/15	26/18	N	Y	Y, ovules 1 - 1.2mm	NA
cruziana	Burkart, A., Troncoso, N.S., Guaglianone, E.R., Palacios, R.A.	26963	SI	NA	10/04/1968	41138	Argentina	NA	NA	NA	NA	Y	NA	Y	N	Y	1.5	2.3	5	10	NA	Y	N	NA	NA	Y	Y	NA	NA	N	Y	25	NA	N	Y	1	2	3	4	Y	NA	NA	Y	15	20	N	Y	NA	N
cruziana	De Egea Juvinel, J., Pena-Chocarro, M., Vera, M., Torres, M., Elsam, R.	738	MO	NA	28/01/2005	MO2256090	Paraguay	8mm	0.2-0.4, 10-15	not visible	not visible	Y	NA	Y	N	Y	3	4	6	11	NA	Y	Y	4mm	?	Y	Y	NA	NA	N	Y	33	35	N	Y	2	3	5	NA	N	NA	NA	N	NA	NA	NA	NA	NA	NA
cruziana	Ericsson, K.	577	MO	NA	15/03/1988	MO1957861	Paraguay	2-3mm	not measurable, very dense	0.5-1mm	0.1-0.2, 5-10	NA	NA	NA	NA	NA	NA	NA	NA	NA	NA	NA	NA	NA	NA	NA	NA	NA	NA	NA	NA	NA	NA	NA	NA	NA	NA	NA	NA	NA	NA	NA	NA	NA	NA	NA	NA	NA	NA
cruziana	Krapovickas, A.,Cristobal, C.L.	12752	MO	sheet 1 of 2	18/03/1967	MO1957860	Argentina	not measured. Too dense and compacted.	not measured	NV	NV	Y	NA	Y	N	Y	2	5	8	NA	NA	Y	Y	0.5-0.8mm	0.1-0.2, 5-8	Y	Y	NA	irregular	N	Y	33	30	N	Y	2	5	8	NA	Y	not visible	not visible	N	NA	NA	NA	NA	N	NA
cruziana	Krapovickas, A.,Cristobal, C.L.	12752	MO	sheet 2 of 2	18/03/1967	MO1955128	Argentina	not measured. Too dense and compacted.	not measured	NV	NV	N	NA	Y	N	Y	3	5	8	NA	NA	N	N	NA	NA	N	NA	NA	NA	N	Y	25	NA	N	Y	nm	nm	nm	NA	Y	Y	N	Y	15	18	N	Y	N	NA
cruziana	Mulgura de Romero, M.E., Anisko, T., Belgrana, M.J., Harbage, J.	4474	SI	NA	12/04/2008	41140	Argentina	NA	NA	NA	NA	NA	NA	NA	NA	NA	NA	NA	NA	NA	NA	NA	NA	NA	NA	NA	NA	NA	NA	NA	NA	NA	NA	NA	NA	NA	NA	NA	NA	NA	NA	NA	NA	NA	NA	NA	NA	NA	N
cruziana	Mulgura de Romero, M.E., Anisko, T., Belgrana, M.J., Harbage, J.	4474	SI	NA	12/04/2008	41139	Argentina	NA	NA	NA	NA	NA	NA	N	NA	NA	NA	NA	NA	NA	NA	NA	NA	NA	NA	NA	NA	NA	NA	NA	NA	NA	NA	NA	NA	NA	NA	NA	NA	NA	NA	NA	NA	NA	NA	NA	NA	NA	N
cruziana	Mulgura de Romero, M.E., Anisko, T., Belgrana, M.J., Harbage, J.	4477	SI	NA	12/04/2008	41142	Argentina	NA	NA	NA	NA	Y	NA	Y	N	Y	4	8	10	13	NA	Y	Y	NA	NA	Y	Y	NA	NA	N	Y	20	50	N	Y	1	2	3	NA	N	NA	NA	Y	14	15	N	Y	NA	N
cruziana	Mulgura de Romero, M.E., Anisko, T., Harbage, J., Illarrage, H.	4249	SI	NA	02/03/2006	41141	Argentina	NA	NA	NA	NA	Y	NA	Y	N	Y	1	4	7	8	9	Y	Y	NA	NA	Y	Y	NA	irregular	N	Y	12.5	60	N	Y	1	2	3.5	5	Y	Y	N	Y	13	17	N	Y	Y, ovules 1.1mm	NA
cruziana	Pedersen, T. M.	4486	MO	NA	27/02/1957	MO1739520	Argentina	not measured- too young and dense	not measured- too young and dense	not measured- too young and dense	not measured- too young and dense	Y	NA	Y	N	Y	2	4	6	NA	NA	Y	N 5%	not measured	NA	Y	Y	NA	NA	N	Y	25	25	N	Y	1	3	6	NA	Y	blac from preservation	black from preservation	Y	13	15	N	Y	N	NA
cruziana	Pederson, T. M.	4486	K	NA	27/02/1957	none	Argentina	very dense	very dense	not visible	not visible	N	NA	Y	N	Y	1	2	5	NA	NA	Y	Y	N	N	N	Y	NA	NA	N	Y	16	35	N	Y	1	3	5	NA	Y	brown from drying	brown from drying	Y	12	16	N	Y, although squashed down to appear rounded	ovules 1mm	NA
cruziana	Quarin, C., A. Schinini, A., Gonzales, J.M., Ishikawa, A.	2196	K	NA	26/02/1974	none	Argentina	na	na	1-1.5mm	0.1-0.2, 10+	Y	Y, 0.5-1mm, 0.1-0.2, 5+	Y	N	Y	2	6	15	18	22	Y	Y 50%	na	na	Y	Y	NA	NA	N	Y	16	10	N	Y	1.5	2	4	NA	Y	Y	N	Y	20	22	N	Y	ovules 1-1.2mm	NA
cruziana	Schinini, A., Wiersema, J. H.	2243	MO	NA	06/04/1982	MO1955125	Argentina	dense and long all over. Not measurable	not measured	not visible	not visible	Y	Y, 2mm, 0.1, 1-8	Y	Y	N	2	4	8	12	18	Y	N 20%	base 1/3, 1mm	0.2mm, 1-8	Y	Y	NA	irregular	N	Y	33	30 (150)	N	Y	1	2	3	NA	Y	Y	N	Y	20	28	N	Y	ovules 1.2-1.5mm	NA
cruziana	Sparre	2363/51	P	NA	12/02/1987	P06792968	Paraguay	NA	NA	NA	NA	?	NA	Y	Y	N	not measurable	NA	NA	NA	NA	Y	Y	NA	NA	Y	Y	NA	NA	N	Y	30	28	N	Y	not measurable	NA	NA	NA	Y	Y	N	Y	(not measurable) shorter	(not measurable) longer	N	Y	NA	NA
cruziana	Walter, M. A.	86	K	NA	--/03/1975	none	Paraguay	1-2mm	0.1-0.2, 10+	2mm	0.05, 20+	NA	NA	NA	NA	NA	NA	NA	NA	NA	NA	NA	NA	NA	NA	NA	NA	NA	NA	NA	NA	NA	NA	NA	NA	NA	NA	NA	NA	NA	NA	NA	NA	NA	NA	NA	NA	NA	NA
cruziana	Zardini, E. M., Guerrero, L.	54765	MO	sheet 1 of 2	20/08/2000	MO1955122	Paraguay	0.5-1.2mm	0.1-0.2, 5-10	0.5-1.2mm	0.1-0.2, 5-10	N	NA	Y	N	Y	2	4	6	NA	NA	Y	Y	NA	NA	N	Y	NA	regular to irregular	N	Y	33	50	N	Y	1	2	3	NA	N	NA	NA	N	NA	NA	NA	NA	NA	NA
cruziana	Zardini, E. M., Guerrero, L.	54765	MO	sheet 2 of 2	20/08/2000	MO1955123	Paraguay	not visible	NA	NA	NA	NA	NA	NA	NA	NA	NA	NA	NA	NA	NA	NA	NA	NA	NA	NA	NA	NA	NA	NA	NA	NA	NA	NA	NA	NA	NA	NA	NA	NA	NA	NA	NA	NA	NA	NA	NA	NA	NA
cruziana	Zardini, E. M., Guerrero, L.	55181	MO	sheet 1 of 2	29/11/2000	MO1955121	Paraguay	not measured	not measured	not visible	not visible	Y	not measured	Y	N	Y	5	7	10	12	NA	Y	N 40%	not measured	not measured	Y	Y	NA	irregular	N	Y	25-33	20	N	Y	2	4	NA	NA	Y	Y	N	Y	14	21	N	Y	ovules 1 - 1.2mm	NA
cruziana	Zardini, E. M., Guerrero, L.	55181	MO	sheet 2 of 2	29/11/2000	MO5256962	Paraguay	1.5mm	0.1-0.2, 10 +	1.5mm	0.1-0.2, 10+	Y	Y, 1.5mm, 0.1-0.2, 10+	Y	N	Y	3	7	12	18	NA	Y	Y	1.5mm	0.1-0.2, 10+	Y	Y	NA	irregular	N	Y	33	60	N	Y	1	2	5	NA	Y	Y	N	12/15	15/20	NA	N	Y	ovules 1.2 - 1.5mm	NA
f. mattogrossensis	Anon s.n. [G.O.A. Malme]	S07-785, S07-784	S	NA	--/07/1894	none	Brazil	NA	NA	NA	NA	N	NA	Y	N	Y	NA	NA	NA	NA	NA	Y	Y	NA	NA	N	Y	NA	NA	Y	N	NA	1010	N	Y	NA	NA	NA	NA	NA	pickled	pickled	NA	shorter: to be measured	longer: to be measured	too immature	too immature	NA	N
f. mattogrossensis	Avellar, A.L.F.	13	COR	NA	13/12/2002	COR00002398	Brazil	NA	NA	NA	NA	not visible	not visible	Y	N	Y	2	4.5	8	9	NA	Y	N 50%	nv	NA	N	Y	NA	regular	Y	N	NA	200 (400)	N	Y	1.5	2.5	3	NA	Y	Y	N	Y	9	12	N	Y	N	NA
f. mattogrossensis	Avellar, A.L.F.	13	COR	NA	13/12/2002	COR00002399	Brazil	NA	NA	NA	NA	not visible	not visible	N	NA	NA	NA	NA	NA	NA	NA	Y	N 25%	NA	NA	NA	Y	NA	regular	Y	N	NA	120 (480)	N	Y	1	2	3	NA	Y	Y	N	N	NA	NA	NA	NA	N	NA
f. mattogrossensis	Lab. Sementes, J.B.R.J.	7053	RB	NA	s.d.	RB00770692	Brazil	NA	NA	NA	NA	NA	NA	NA	NA	NA	NA	NA	NA	NA	NA	NA	NA	NA	NA	NA	NA	NA	NA	NA	NA	NA	NA	NA	NA	NA	NA	NA	NA	NA	NA	NA	NA	NA	NA	NA	NA	NA	NA
f. mattogrossensis	Ritter, N., Crow, G.E., Garvisu, M., Crow, C.	4562	MO	sheet 1 of 2	16/07/1998	MO1955111	Bolivia	NA	NA	NA	NA	N	N	Y	N	Y	2	9	6	10	15	Y	N 2%	NA	NA	N	Y	NA	regular	Y	N	NA	50 (1000)	N	Y	1	2	3	10	Y	Y	N	Y	20/26	22/26	NA	NA	NA	NA
f. mattogrossensis	Ritter, N., Crow, G.E., Garvisu, M., Crow, C.	4562	MO	sheet 2 of 2	16/07/1998	MO1955112	Bolivia	?	0.1-0.2, ?	0.5mm	0.1-0.2, 3-5	NA	NA	NA	NA	NA	NA	NA	NA	NA	NA	NA	NA	NA	NA	NA	NA	NA	NA	NA	NA	NA	NA	NA	NA	NA	NA	NA	NA	NA	NA	NA	NA	NA	NA	NA	NA	NA	NA
f. mattogrossensis	Sanches, A.L., Bortolotto, J. M., Damascenos Jr, G.	44	COR	NA	12/08/1994	COR0002400	Brazil	NA	NA	NA	NA	N	NA	Y	N	Y	4	8	14	NA	NA	Y	Y	NA	NA	N	Y	NA	regular	Y	N	NA	442	N	Y	1	1.5	4	NA	Y	brown from drying	brown from drying	N	NA	NA	NA	NA	N	NA
f. mattogrossensis	Souza Jr, A.F., Siqueira, C.S.	39	COR	NA	27/11/2004	COR0002379	Brazil	NA	NA	NA	NA	N	NA	Y	N	Y	2	4	8	NA	NA	N	N	NA	NA	N	NA	NA	NA	NA	NA	NA	NA	NA	NA	NA	NA	NA	NA	Y	N	N pink	N	NA	NA	NA	NA	NA	NA
sp.	Barbaso, D.	14; COR 10.674	COR	NA	27/11/2004	COR0002401	Brazil	NA	NA	NA	NA	NA	NA	Y	N	Y	1.5	3	9	NA	NA	N	N	NA	NA	NA	NA	NA	NA	NA	NA	NA	NA	NA	NA	NA	NA	NA	NA	?	NA	NA	Y	15	20	NA	NA	NA	NA
sp.	Glaziou	s.n.	P	NA	s.d.	P06792965	Brazil	NA	NA	NA	NA	NA	NA	NA	NA	NA	NA	NA	NA	NA	NA	N	NA	NA	NA	NA	NA	NA	NA	NA	NA	NA	NA	NA	NA	NA	NA	NA	NA	NA	NA	NA	NA	NA	NA	NA	NA	NA	NA
sp.	Weddell	3422	P	NA	01/07/1845	P06792962	Brazil	NA	NA	NA	NA	N	NA	Y	N	Y	not measurable	NA	NA	NA	NA	N	NA	NA	NA	N	NA	NA	NA	NA	NA	NA	NA	NA	NA	NA	NA	NA	NA	N	NA	NA	N	NA	NA	NA	NA	NA	NA
sp.	Weddell, M.H.A.	3422	P	NA	7-8/1845	P06792963	Brazil	NA	NA	NA	NA	NA	NA	NA	NA	NA	NA	NA	NA	NA	NA	N	NA	NA	NA	NA	NA	NA	NA	NA	NA	NA	NA	NA	NA	NA	NA	NA	NA	NA	NA	NA	NA	NA	NA	NA	NA	NA	NA
[truncated: 5 more columns]
