# Supplementary material for: Revised Species Delimitation in the Giant Water Lily Genus Victoria (Nymphaeaceae) Confirms a New Species and Has Implications for Its Conservation
Source: Front Plant Sci. 2022 Jul 4;13:883151. doi: 10.3389/fpls.2022.883151 (PMC9289450; doi:10.3389/fpls.2022.883151)
Supplement: Supplementary file 2 [file Table_5.xlsx]

## Sheet: iNaturalist
Table S5 Morphological observations from iNaturalist images.
Morphospecies	Inaturalist ID	Longitude	Latitutude	Date captured	Country	State	Locality	URL	Leaves	Leaf colour adaxial/abaxial	Rims present	Low rims	Moderate rims	High rims	Colour rim	Curved/perpendicular rims	Recurved rim/over	Flared rim/sigmoid	Flowers	Bud flower	Open flower	Outer tepal abaxial visible	Outer tepal prickles present	Outer tepal prickles covering	Outer tepal prickles partly covering	Outer tepal prickles spacing	Outer tepal prickles number	Outer tepal prickles long	Outer tepal prickles short	Inner tepals visible	First night flower open	Colour first night flower	Second night flower open	Colour second night	Fruit	Seed
mattogrossensis	8504852	-57.803606	-16.339997	14 July 2017	Brazil	Mato Grosso	Caceres, Piruval	https://www.inaturalist.org/observations/8504852	Y	green	Y	N	Y	N	maroon	NA	Y	N	Y	Y	Y	Y	Y	Y	N	regular	not countable	N	Y	Y	N	NA	Y	white and pale pink	N	N
matogrossensis	8504850	-57.803575	-16.340022	14 July 2017	Brazil	Mato Grosso	Caceres, Piruval	https://www.inaturalist.org/observations/8504850	Y	green	Y	N	Y	N	maroon	NA	Y	N	Y	Y	Y	Y	Y	Y	N	NA	not countable	N	Y	Y	NA	NA	Y	white and pale pink	N	N
mattogrossensis	47077077 1/3	-56.709709	-17.287934	8 June 2014	Brazil	Mato Grosso	Barao de Melgaco	https://www.inaturalist.org/observations/47077077	Y	green	Y	N	Y	N	light maroon on mature, white on young	Y	Y	N	Y	N	Y	N	NA	NA	NA	NA	NA	NA	NA	Y	Y or early second	white/very pale pink	Y maybe early	white and very pale pink	N	N
mattogrossensis	47077077 2/3	-56.709709	-17.287934	8 June 2014	Brazil	Mato Grosso	Barao de Melgaco	https://www.inaturalist.org/observations/47077077	Y	green	Y, unfolding leaf	NA	Y	N	light maroon on mature, white on young	NA	NA	NA	N	NA	NA	NA	NA	NA	NA	NA	NA	NA	NA	NA	NA	NA	NA	NA	N	N
mattogrossensis	47077077 3/3	-56.709709	-17.287934	8 June 2014	Brazil	Mato Grosso	Barao de Melgaco	https://www.inaturalist.org/observations/47077077	Y	green	Y, young leaf	NA	NA	NA	very light maroon	NA	NA	NA	N	NA	NA	NA	NA	NA	NA	NA	NA	NA	NA	NA	NA	NA	NA	NA	N	N
mattogrossensis	20327463 1/3	-56.809759	-17.373684	15 Sept 2015	Brazil	Mato Grosso	Pocone	https://www.inaturalist.org/observations/20327463	Y	green	Y,	Y	Y	N	light maroon	N	Y	N	N	NA	NA	NA	NA	NA	NA	NA	NA	NA	NA	NA	NA	NA	NA	NA	N	N
mattogrossensis	20327463 2/3	-56.809759	-17.373684	15 Sept 2015	Brazil	Mato Grosso	Pocone	https://www.inaturalist.org/observations/20327463	Y	green	Y, unfolding	NA	NA	NA	light green and maroon	NA	NA	NA	Y, spent, submerged	N	N	Y	Y	Y	N	regular,	not countable	N	Y	N	N	NA	N	NA	N	N
mattogrossensis	20327463 3/3	-56.809759	-17.373684	15 Sept 2015	Brazil	Mato Grosso	Pocone	https://www.inaturalist.org/observations/20327463	Y	green	Y	Y	Y	N	light maroon	N	Y	N	Y	N	Y	N	NA	NA	NA	NA	NA	NA	NA	Y	N	NA	N	white and pale pink	N	N
mattogrossensis	40360119 1/3	-56.775965	-17.363482	4 Aug 2019	Brazil	Mato Grosso	Pocone, Porto Jofre	https://www.inaturalist.org/observations/40360119	Y	green	Y	N	Y	N	light maroon	N	Y	N	Y	Y	N	Y, 55%	Y	Y	N	regular	410 (745)	N	Y	N	NA	NA	NA	NA	N	N
mattogrossensis	40360119 2/3	-56.775965	-17.363482	4 Aug 2019	Brazil	Mato Grosso	Pocone, Porto Jofre	https://www.inaturalist.org/observations/40360119	Y	green	Y	N	Y	N	light maroon	N	Y	N	Y	Y	NA	Y	Y	Y	NA	regular	see ID 11, 9	N	Y	NA	NA	NA	NA	NA	NA	NA
mattogrossensis	40360119 3/3	-56.775965	-17.363482	4 Aug 2019	Brazil	Mato Grosso	Pocone, Porto Jofre	https://www.inaturalist.org/observations/40360119	N	NA	NA	NA	NA	NA	NA	NA	NA	N	Y	Y	NA	Y	Y	Y	NA	regular	see ID 10, 9	N	Y	NA	NA	NA	NA	NA	NA	NA
boliviana	18398989	-65.208219	-14.874078	20 Aug 2009	Bolivia	Beni	Moxos	https://www.inaturalist.org/observations/18398989	Y	green	Y	Y	Y	N	light green and maroon	N	Y	N	Y	Y	Y	N	NA	NA	NA	NA	NA	NA	NA	NA	Y	white	N	NA	N	N
mattogrossensis	8054907	-56.776222	-17.36345	29 Aug 2017	Brazil	Mato Grosso	Pocone, Porto Jofre	https://www.inaturalist.org/observations/8054907	Y	green	Y, mature and unfolding	Y	Y	N	light maroon	N	Y	N	Y	N	Y	Y, 30%	Y	Y	N	regular	260 (866 estimated)	N	Y	Y	N	NA	Y	white and pale pink	N	N
mattogrossensis	8788584	-56.776173	-17.363467	2 Sep 2017	Brazil	Mato Grosso	Pocone, Porto Jofre	https://www.inaturalist.org/observations/8788584	Y	green	Y	Y	Y	N	light maroon	N	Y	N	Y	N	Y	N	NA	NA	NA	NA	NA	NA	NA	Y	Y	white	N	NA	N	N
mattogrossensis	31305311	-56.776153	-17.36348	25 July 2019	Brazil	Mato Grosso	Pocone, Porto Jofre	https://www.inaturalist.org/observations/31305311	N	NA	NA	NA	NA	NA	NA	NA	NA	NA	Y	N	Y	N	NA	NA	NA	NA	NA	NA	NA	NA	N	NA	Y, early	white and pale pink. Note tips of outer staminodes pale	N	N
mattogrossensis	31279820	-56.77617	-17.363575	24 July 2019	Brazil	Mato Grosso	Pocone, Porto Jofre	https://www.inaturalist.org/observations/31279820	Y	green	Y, unfurling young leaf	NA	NA	NA	light green and maroon	N	NA	NA	Y	N	Y	N	NA	NA	NA	NA	NA	NA	NA	Y	N	NA	Y	white and pale pink	N	N
mattogrossensis	31660321	-56.776115	-17.36371	25 July 2019	Brazil	Mato Grosso	Pocone, Porto Jofre	https://www.inaturalist.org/observations/31660321	Y	green	Y, unfurling young leaf	NA	NA	NA	light green and marron	N	NA	NA	Y	N	Y	N	NA	NA	NA	NA	NA	NA	NA	Y	N	NA	Y	white and pale pink, petalodes darker pink at base	N	N
mattogrossensis	31250944 1/3	-56.775931	-17.364182	4 August 2019	Brazil	Mato Grosso	Pocone, Porto Jofre	https://www.inaturalist.org/observations/31250944	N	NA	NA	NA	NA	NA	NA	NA	NA	NA	Y	N	Y	N	NA	NA	NA	NA	NA	NA	NA	Y	Y	white	N	NA	N	N
mattogrossensis	31250944 2/3	-56.775931	-17.364182	4 August 2019	Brazil	Mato Grosso	Pocone, Porto Jofre	https://www.inaturalist.org/observations/31250944	Y	green	Y, young but fully expanded	Y	NA	NA	light maroon	N	Y	NA	N	NA	NA	NA	NA	NA	NA	NA	NA	NA	NA	NA	NA	NA	NA	NA	NA	NA
mattogrossensis	31250944 3/3	-56.775931	-17.364182	4 August 2019	Brazil	Mato Grosso	Pocone, Porto Jofre	https://www.inaturalist.org/observations/31250944	Y	green	Y	Y	Y	N	light maroon	N	Y	N	N	N	N	NA	NA	NA	NA	NA	NA	NA	NA	NA	NA	NA	NA	NA	NA	NA
mattogrossensis	31232741 1/3	-56.775856	-17.36452	3 August 2019	Brazil	Mato Grosso	Pocone, Porto Jofre	https://www.inaturalist.org/observations/31232471	N	green	Y	Y	Y	N	light maroon	N	Y	N	Y	N	Y	Y, 30%	Y	Y	N	regular	250 (833 estimated)	N	Y	Y	N	NA	Y	white and pale pink, darker pink on sepal margin, dark pink petalodes at base	N	N
mattogrossensis	31232741 2/3	-56.775856	-17.36452	3 August 2019	Brazil	Mato Grosso	Pocone, Porto Jofre	https://www.inaturalist.org/observations/31232471	Y	green	Y	Y	Y	N	maroon	N	Y	N	Y	N	Y	N	NA	NA	NA	NA	NA	NA	NA	NA	NA	NA	Y	white and pale pink	N	N
mattogrossensis	31232741 3/3	-56.775856	-17.36452	3 August 2019	Brazil	Mato Grosso	Pocone, Porto Jofre	https://www.inaturalist.org/observations/31232471	Y	green	Y	Y	Y	N	maroon	N	Y	N	N	NA	NA	NA	NA	NA	NA	NA	NA	NA	NA	NA	NA	NA	NA	NA	NA	NA
mattogrossensis	22693198 1/2	-56.773131	-17.364933	15 July 2017	Brazil	Mato Grosso	Pocone, Porto Jofre	https://www.inaturalist.org/observations/22693198	Y	green	Y	Y	Y	N	light to dark maroon	N	Y	N	Y	N	Y	N	NA	NA	NA	NA	NA	NA	NA	Y	N	NA	Y	white and very pale pink (base of petals only)	N	N
mattogrossensis	22693198 2/2	-56.773131	-17.364933	15 July 2017	Brazil	Mato Grosso	Pocone, Porto Jofre	https://www.inaturalist.org/observations/22693198	Y	green	Y	Y	Y	N	light to dark maroon	N	Y	N	Y	N	Y	N	NA	NA	NA	NA	NA	NA	NA	Y	N	NA	Y, early	white and very pale pink	N	N
mattogrossensis	35167856 1/2	-57.552688	-18.748286	5 September 1981	Brazil	Mato Grosso	Sapezal	https://www.inaturalist.org/observations/35167856	Y	green	Y	N	Y	N	maroon	N	Y	N	Y	Y	Y	N	NA	NA	NA	NA	NA	NA	NA	Y	Y	white	N	NA	N	N
mattogrossensis	35167856 2/2	-57.552688	-18.748286	5 September 1981	Brazil	Mato Grosso	Sapezal	https://www.inaturalist.org/observations/35167856	Y	green	Y	NA	Y	N	maroon and light maroon	N	Y	N	Y	N	Y	N	NA	NA	NA	NA	NA	NA	NA	Y	Y	white	N	NA	N	N
cruziana	47990535	-57.489972	-25.085978	7 March 2020	Paraguay	Presidente Hayes	Benjanin Aceval	https://www.inaturalist.org/observations/47990535	Y	green	Y	N	N	Y	green	N	Y	Y	Y	Y	Y	N	NA	NA	NA	NA	NA	NA	NA	Y	N	NA	Y likely	white and pale pink	N	N
cruziana	25703910 1/2	-57.47865	-25.109547	6 January 2018	Paraguay	Central	Limpio	https://www.inaturalist.org/observations/25703910	Y	green	Y	N	N	Y	green	N	Y	Y	Y	N	Y	NA	NA	NA	NA	NA	NA	NA	NA	NA	NA	NA	NA	NA	N	N
cruziana	25703910 2/2	-57.47865	-25.109547	6 January 2018	Paraguay	Central	Limpio	https://www.inaturalist.org/observations/25703910	Y	green	Y	N	N	Y	green	N	Y	Y	Y	NA	NA	NA	NA	NA	NA	NA	NA	NA	NA	NA	NA	NA	NA	NA	NA	NA
cruziana	47596112	-57.475683	-25.162297	7 March 2020	Parguay	Central	Limpio	https://www.inaturalist.org/observations/47596112	Y	green	Y	N	N	Y	green	N	Y	Y	Y	Y	N	N	NA	NA	NA	NA	NA	NA	NA	NA	NA	NA	NA	NA	N	N
cruziana	41597516	-58.152755	-26.172912	20 January 2018	Argentina	Formosa	Formosa	https://www.inaturalist.org/observations/41597516	Y	green	Y	N	N	Y	green	N	Y	Y	Y	NA	NA	NA	NA	NA	NA	NA	NA	NA	NA	NA	NA	NA	NA	NA	N	N
cruziana	35772480	-58.145833	-26.1675	20 April 2018	Argentina	Formosa	Formosa	https://www.inaturalist.org/observations/35772480	Y	green	Y	N	N	Y	green, light maroon	N	Y	Y	Y	N	Y	N (too far)	NA	NA	NA	NA	NA	NA	NA	Y	Y	white	Y	white and pink	N	N
cruziana	38465815	-58.166289	-26.223596	3 February 2020	Argentina	Formosa	Formosa	https://www.inaturalist.org/observations/38465815	Y	green	Y	N	Y	Y	green	N	Y	Y	Y	N	Y	N	NA	NA	NA	NA	NA	NA	NA	Y	N	NA	Y, early	white and pale pink (pink is all over petals), crinkly petals	N	N
cruziana	12253146	-58.199722	-26.24	29 March 2013	Argentina	Formosa	Formosa	https://www.inaturalist.org/observations/1223146	Y	green	Y	N	N	Y	green	N	Y	Y	N	Y	N	Y (partial - upper half)	N	NA	NA	NA	not countable	NA	NA	NA	NA	NA	NA	NA	N	N
cruziana	16249075	-58.422198	-26.960643	25 May 2018	Paraguay	Neembucu	Isla Umbu	https://www.inaturalist.org/observations/16249075	Y	green	Y	N	Y	Y	green	N	Y	Y	Y	N	Y	N	NA	NA	NA	NA	NA	NA	NA	Y	Y	white	NA	NA	N	N
cruziana	19516477	-58.731746	-27.094628	6 March 2016	Argentina	Chao	Bermejo	https://www.inaturalist.org/observations/19516477	Y	green	Y	N	N	Y	both green and light maroon at rim margin	N	Y	Y	Y	N	Y	N	NA	NA	NA	NA	NA	NA	NA	Y	Y	white, crinkly petals	N	NA	N	N
cruziana	56708356 1/3	-58.832971	-27.408756	26 June 2017	Argentina	Chaco	Corrientes	https://www.inaturalist.org/observations/56708356	Y	green	Y	N	N	Y	green, light maroon rim margin	N	Y	Y	Y	Y	Y	Y	N	NA	NA	NA	not countable	NA	NA	Y	Y	white, crinkly petals	N	NA	N	N
cruziana	56708356 2/3	-58.832971	-27.408756	26 June 2017	Argentina	Chaco	Corrientes	https://www.inaturalist.org/observations/56708356	Y	green	Y	N	N	Y	green, light maroon rim margin	N (young, unfolding)	N	Y	N	NA	NA	NA	NA	NA	NA	NA	NA	NA	NA	NA	NA	NA	NA	NA	N	N
cruziana	56708356 3/3	-58.832971	-27.408756	26 June 2017	Argentina	Chaco	Corrientes	https://www.inaturalist.org/observations/56708356	Y	green	Y	N	N	Y	green, light maroon rim margin	N	Y	Y	Y	Y	N	N (too far)	NA	NA	NA	NA	NA	NA	NA	NA	NA	NA	NA	NA	N	N
cruziana	19756472	-58.972225	-27.452991	30 April 2016	Argentina	Chaco	San Fernando	https://www.inaturalist.org/observations/19756472	Y	green	Y	N	N	Y	green	N	Y	Y	Y	Y	Y	N	NA	NA	NA	NA	NA	NA	NA	Y	Y	white, crinkly petals	N	NA	N	N
cruziana	88305 1/3	-59.588299	-30.021989	30 April 2013	Argentina	Santa Fe	San Javier	https://www.inaturalist.org/observations/883050	Y	green	Y	N	N	Y	green	Y	Y	Y	Y	Y	Y	Y	N	NA	NA	NA	NA	NA	NA	Y	Y	white	Y	dark pink all over with whit streaks margins	N	N
cruziana	88305 2/3	-59.588299	-30.021989	30 April 2013	Argentina	Santa Fe	San Javier	https://www.inaturalist.org/observations/883050	Y	green	Y	N	N	Y	green	N	Y	Y	Y	N	Y	N	NA	NA	NA	NA	NA	NA	NA	Y	Y	white, crinkly petals	N	NA	N	N
cruziana	88305 3/3	-59.588299	-30.021989	30 April 2013	Argentina	Santa Fe	San Javier	https://www.inaturalist.org/observations/47310054	Y	green	Y	N	N	Y	green	N	Y	Y	Y	N	Y	Y, only tip	N not on visible tip	NA	NA	NA	NA	NA	NA	Y	N	NA	Y	spent flower, dark pink al over, white streaks on margins	N	N
cruziana	47310054 1/5	-59.930634	-30.597365	21 Feruary 2015	Argentina	Santa Fe	San Javier	https://www.inaturalist.org/observations/47310054	Y	green	Y	N	Y	Y	green	N	Y	Y	Y	Y	Y	Too far away	NA	NA	NA	NA	NA	NA	NA	NA	NA	NA	NA	NA	N	N
cruziana	47310054 2/5	-59.930634	-30.597365	21 Feruary 2015	Argentina	Santa Fe	San Javier	https://www.inaturalist.org/observations/47310054	Y	green	Y	N	N	Y	green	N	Y	Y	Y	Y	Y	Y	N	NA	NA	NA	NA	NA	NA	Y	Y	white	Y	white, pale pink at base	N	N
cruziana	47310054 3/5	-59.930634	-30.597365	21 Feruary 2015	Argentina	Santa Fe	San Javier	https://www.inaturalist.org/observations/47310054	Y	green	Y	N	Y	Y	green	N	Y	Y	N	NA	NA	NA	NA	NA	NA	NA	NA	NA	NA	NA	NA	NA	NA	NA	N	N
cruziana	47310054 4/5	-59.930634	-30.597365	21 Feruary 2015	ArgentinaSan Javier	Santa Fe	San Javier	https://www.inaturalist.org/observations/47310054	Y	green	Y	N	N	Y	green	N	Y	Y	Y	Y	Y	too far away	NA	NA	NA	NA	NA	NA	NA	NA	NA	NA	NA	NA	N	N
cruziana	47310054 5/5	-59.930634	-30.597365	21 Feruary 2015	Argentina	Santa Fe	San Javier	https://www.inaturalist.org/observations/47310054	Y	green	Y	N	N	Y	green	N	Y	Y	Y	Y	NA	too far away	NA	NA	NA	NA	NA	NA	NA	NA	NA	NA	NA	NA	N	N
cruziana	20905920	-60.092748	-31.0944	10 February 2019	Argentina	Santa Fe	Garay	https://www.inaturalist.org/observations/20905920	Y	green	Y	N	N	Y	green	N	Y	Y	Y	N	Y	Y	N	NA	NA	NA	NA	NA	NA	Y	Y	white, crinkly petals	N	NA	N	N
cruziana	21270698 4 in total, almost identical	-60.486073	-31.51626	17 March 2013	Argentina	Santa Fe	La Capital	https://www.inaturalist.org/observations/21270698	Y	green	Y	N	N	Y	green, light maroon rim margin	N	Y	Y	Y	N	Y	too far away	NA	NA	NA	NA	NA	NA	NA	NA	NA	white petals	NA	NA	N	N
cruziana	19686973 5 in total, identical	-60.652987	-32.129617	18 February 2009	Argentina	Entre Rios	Diamante	https://www.inaturalist.org/observations/19686973	Y	green	Y	N	N	Y	green	N	Y	Y	N	NA	NA	NA	NA	NA	NA	NA	NA	NA	NA	NA	NA	NA	NA	NA	N	N
cruziana	44398386	-60.62929	-32.886575	30 Apri 2017	Argentina	Entre Rios	Victoria	https://www.inaturalist.org/observations/44398386	Y	green	Y, rims unfurling	N	N	Y	green, light maroon rim margin	N	Y	Y	Y	N	Y	Y on spent flower	N, maybe a few at base	NA	NA	NA	NA	NA	NA	Y	N	NA	Y	white and pink, pinkest at bases petals, crinkly petals	N	N
cruziana	43510141	-60.61669	-32.921326	5 April 2017	Argentina	Entre Rios	Victoria	https://www.inaturalist.org/observations/43510141	Y	green	Y	N	N	Y	green	N	Y	Y	Y	Y	Y	Y on bud. OT's dark maroon	N, maybe a few? On lower third	NA	NA	NA	NA	NA	NA	Y	N	NA	Y	white and pink, pink towards base petals	N	N
amazonica	1116550 1/5	-58.76674	-5.979301	6 December 2014	Guyana	Upper Demerara-Berbice	Makouria River	https://www.inaturalist.org/observations/1116550	Y	green	Y	Y	Y	Y, congested environment	maroon	Y	N	N	Y	Y	Y	too far away	NA	NA	NA	NA	NA	NA	NA	NA	NA	NA	NA	NA	N	N
amazonica	1116550 2/5	-58.76674	-5.979301	6 December 2014	Guyana	Upper Demerara-Berbice	Makouria River	https://www.inaturalist.org/observations/1116550	Y	green	Y	Y	Y	NA	maroon	Y, 45 degrees	NA	NA	Y	Y	N	too far away	NA	NA	NA	NA	NA	NA	NA	NA	NA	NA	NA	NA	N	N
amazonica	1116550 3/5	-58.76674	-5.979301	6 December 2014	Guyana	Upper Demerara-Berbice	Makouria River	https://www.inaturalist.org/observations/1116550	Y	green	Y, rims both low and slightly higher, or high, 45 degrees, curved	Y	N	N	maroon	Y	N	N	Y	Y	Y	too far away	NA	NA	NA	NA	NA	NA	NA	NA	NA	NA	NA	NA	N	N
amazonica	1116550 4, 5/5	-58.76674	-5.979301	6 December 2014	Guyana	Upper Demerara-Berbice	Makouria River	https://www.inaturalist.org/observations/1116550	Y	green	Y	Y	Y	N	maroon	Y	N	N	Y	Y	N	too far away	NA	NA	NA	NA	NA	NA	NA	NA	NA	NA	NA	NA	N	N
amazonica	15745912	-58.505233	4.247119	21 July 2018	Guyana	Upper Takutu-Upper Essequibo	Rest of Region 9	https://www.inaturalist.org/observations/15745912	Y	green	Y	Y	N	N	maroon	Y, 90 degrees	N	N	N	NA	NA	NA	NA	NA	NA	NA	NA	NA	NA	NA	NA	NA	NA	NA	N	N
amazonica	45279665 1/3	-59.123847	3.93153	16 March 2012	Guyana	Upper Takutu-Upper Essequibo	Yakarinta- Wowetta	https://www.inaturalist.org/observations/45279665	Y	green	Y	N	Y	Y, congested environment	maroon	Y, 90 degrees	N	N	Y	Y	Y	Y	Y	NA	NA	NA	NA	too far away	NA	Y	N	NA	Y	pink	N	N
amazonica	45279665 2/3	-59.123847	3.93153	16 March 2012	Guyana	Upper Takutu-Upper Essequibo	Yakarinta- Wowetta	https://www.inaturalist.org/observations/45279665	Y	green	Y and N, including none on larger leaves	Y	N	N	maroon	Y, 45 and 90 degrees	N	N	Y	N	Y	too far away - wide shot	NA	NA	NA	NA	NA	NA	NA	NA	NA	NA	NA	NA	N	N
amazonica	45279665 3/3	-59.123847	3.93153	16 March 2012	Guyana	Upper Takutu-Upper Essequibo	Yakarinta- Wowetta	https://www.inaturalist.org/observations/45279665	Y	green	Y	Y	N	N	maroon	Y, 15 degrees	N	N	Y	N	Y	Y, edge only	Y	Y	NA	NA	NA	Y	N	Y	N	NA	Y, early	white, flushing pink	N	N
amazonica	15852553	-59.295456	3.748394	22 June 2018	Guyana	Upper Takutu-Upper Essequibo	Yakarinta- Wowetta	https://www.inaturalist.org/observations/15852553	Y	green	Y and N, including large leaves	Y	N	N	maroon	Y, 45 and 90 degrees	N	N	N	NA	NA	NA	NA	NA	NA	NA	NA	NA	NA	NA	NA	NA	NA	NA	N	N
amazonica	635983 1/2	-59.295326	3.748124	17 November 2018	Guyana	Upper Takutu-Upper Essequibo	Yakarinta-Wowetta, Surama	https://www.inaturalist.org/observations/635983	Y	green	Y, low, 45 degrees, curving	Y	N	N	maroon	Y, 45 degrees	N	N	Y	N	Y	N	NA	NA	NA	NA	NA	NA	NA	Y	Y	white	N	NA	N	N
amazonica	635983 2/2	-59.295326	3.748124	17 November 2018	Guyana	Upper Takutu-Upper Essequibo	Yakarinta-Wowetta, Surama	https://www.inaturalist.org/observations/635983	Y	green	Y, low, 45 degrees, curved	Y	N	N	maroon	Y, 45 degrees	N	N	Y	N	Y	N	NA	NA	NA	NA	NA	NA	NA	Y	N	NA	Y	deep pink, darker maroon in centre	N	N
amazonica	9451814 1/2	-59.308258	3.750822	5 March 2007	Guyana	Upper Takutu-Upper Essequibo	Toka - Jakaretinga	https://www.inaturalist.org/observations/9451814	Y	green	partial only	Y	N	N	maroon	Y	N	N	Y	N	Y	N	NA	NA	NA	NA	NA	NA	NA	Y	Y	white, maroon visible inner petals - with beetle	N	NA	N	N
amazonica	9451814 2/2	-59.308258	3.750822	5 March 2007	Guyana	Upper Takutu-Upper Essequibo	Toka - Jakaretinga	https://www.inaturalist.org/observations/9451814	Y	green	Y	Y	Y	N	maroon	Y, 90 degrees	N	N	Y	Y	Y	Y	Y	Y	NA	NA	NA	Y	N	Y	Y	white	N	NA	N	N
amazonica	525202 1/3	-59.329548	3.69647	10 February 2009	Guyana	Upper Takutu-Upper Essequibo	Yakarinta - Wowetta, Surama	https://www.inaturalist.org/observations/525202	Y	green	Y	Y	N	N	maroon	Y, 90 degrees	N	N	Y	Y	Y	too far away	NA	NA	NA	NA	NA	NA	NA	Y	Y	white	N	NA	N	N
amazonica	525202 2/3	-59.329548	3.69647	10 February 2009	Guyana	Upper Takutu-Upper Essequibo	Yakarinta - Wowetta, Surama	https://www.inaturalist.org/observations/525202	Y	green	Y	Y	N	N	maroon	Y, 90 degrees	N	N	N	NA	NA	NA	NA	NA	NA	NA	NA	NA	NA	NA	NA	NA	NA	NA	N	N
amazonica	525202 3/3	-59.329548	3.69647	10 February 2009	Guyana	Upper Takutu-Upper Essequibo	Yakarinta - Wowetta, Surama	https://www.inaturalist.org/observations/525202	Y	green	Y	Y	N	N	maroon	Y, 90 degrees	N	N	Y	Y	Y	Y	Y	Y	NA	NA	NA	Y	N	Y	Y	white	NA	NA	N	N
amazonica	32511297 3 photos, all leaves	-59.347986	3.674892	10 September 2019	Guyana	Upper Takutu-Upper Essequibo	Yakarinta - Wowetta, Surama	https://www.inaturalist.org/observations/32511297	Y	green	Y	N	Y, dense population	Y, dense population	maroon/green	Y, 90 degrees	N	N	N	NA	NA	NA	NA	NA	NA	NA	NA	NA	NA	NA	Y	white, maroon inners	Y	pink, darker inners	N	N
amazonica	61074769	-59.343042	3.660387	31 January 2019	Guyana	Upper Takutu-Upper Essequibo	Upper Takutu-Upper Essequobo	https://www.inaturalist.org/observations/61074769	Y	green	Y	Y	Y	N	maroon	Y, 90 degrees	N	N	Y	N	Y	N	NA	NA	NA	NA	NA	NA	NA	NA	NA	white and pink	NA	NA	N	N
amazonica	9174107 1/2	-59.790001	3.371667	29 January 2014	Guyana	Upper Takutu-Upper Essequibo	Ireng/Sawariau	https://www.inaturalist.org/observations/9174107	Y	green	Y	Y	N	N	maroon	Y, 90 degrees	N	N	Y	Y	Y	too far away	NA	NA	NA	NA	NA	NA	NA	NA	N	NA	Y	see next pic for more info	N	N
amazonica	9174107 2/2	-59.790001	3.371667	29 January 2014	Guyana	Upper Takutu-Upper Essequibo	Ireng/Sawariau	https://www.inaturalist.org/observations/9174107	Y	green	Y	N	Y	N	maroon	Y	N	N	Y	N	Y	N	NA	NA	NA	NA	NA	NA	NA	NA	N	NA	Y	inner petals and petalodes deep pink/maroon, outers all white	N	N
mattogrossensis (cult)	33982090	-48.44093	-1.421157	6 October 2019	Brazil	Para	Belem, Utinga State Park	https://www.inaturalist.org/observations/33982090	Y	green	Y	Y	Y	N	maroon/green	N	Y	N	Y	N	N	Y	Y	Y	NA	regular	to be counted	N	Y	Y partial	N	NA	N, spent flower	NA	N	N
boliviana	62457426	-65.04521	-12.820989	7 November 2017	Bolivia	El Beni	Yacuma (Puerto Siles)	https://www.inaturalist.org/observations/62457426	Y	green	Y	Y	Y	N	white	N	Y	N	N	N	NA	NA	NA	NA	NA	NA	NA	NA	NA	NA	NA	NA	NA	NA	N	N
amazonica	26382442 2 photos, leaves only	-54.623053	-2.474785	29 May 2019	Brazil	Para	Santarem	https://www.inaturalist.org/observations/26382442	Y	green	Y	Y	N	N	maroon	Y	N	N	N	NA	NA	NA	NA	NA	NA	NA	NA	NA	NA	NA	NA	NA	NA	NA	N	N
amazonica	8683881	-54.728823	-2.39235	12 August 2012	Brazil	Para	Santarem	https://www.inaturalist.org/observations/8683881	Y	green	Y	Y	Y	N	maroon/green	too far away	NA	NA	N	NA	NA	NA	NA	NA	NA	NA	NA	NA	NA	NA	NA	NA	NA	NA	N	N
amazonica	19502338	-54.733572	-2.385142	7 September 1999	Brazil	Para	Santarem	https://www.inaturalist.org/observations/19502338	Y	green	Y	Y	N	N	Maroon	Y	N	N	N	NA	NA	NA	NA	NA	NA	NA	NA	NA	NA	NA	NA	NA	NA	NA	N	N
amazonica	26329395 3 photos, same bud and flower	-54.750062	-2.347232	30 May 2019	Brazil	Para	Santarem	https://www.inaturalist.org/observations/26329395	Y	green	Y	Y	Y	N	maroon/green	Y, 90 degrees	N	N	Y	Y	Y	Y	Y	Y	N	regular to irregular	count	Y	N	Y	N	NA	Y	turning pink	N	N
amazonica	24958095	-54.850917	-2.266025	30 April 2019	Brazil	Para	Santarem	https://www.inaturalist.org/observations/24958095	Y	green	Y	N	Y	Y	maroon/green	Y, 90 degrees	N	N	N	NA	NA	NA	NA	NA	NA	NA	NA	NA	NA	NA	NA	NA	NA	NA	N	N
amazonica	6710083	-54.854393	-2.266102	2 March 2008	Brazil	Para	Santarem	https://www.inaturalist.org/observations/6710083	Y	green	Y	Y	Y	N	maroon/green (low water)	Y, 90 degrees	N	N	N	NA	NA	NA	NA	NA	NA	NA	NA	NA	NA	NA	NA	NA	NA	NA	NA	NA
amazonica	12194823	-54.862289	-2.300331	14 August 2004	Brazil	Para	Santarem	https://www.inaturalist.org/observations/12194823	Y	green	Y	N	Y	Y, dense population	maroon/green (low water)	Y	N	N	N	NA	NA	NA	NA	NA	NA	NA	NA	NA	NA	NA	NA	NA	NA	NA	NA	NA
amazonica	25938393	-54.858586	-2.298044	13 April 2019	Brazil	Para	Santarem	https://www.inaturalist.org/observations/25938393	Y	green	Y	Y	Y	N	maroon/green	Y, 90 degrees	N	N	N	NA	NA	NA	NA	NA	NA	NA	NA	NA	NA	NA	NA	NA	NA	NA	NA	NA
amazonica	25915077	-54.858428	-2.298087	13 April 2019	Brazil	Para	Santarem	https://www.inaturalist.org/observations/25915077	Y	green	Y, and unfurling	N	Y	N	maroon/green	Y	N	N	N	NA	NA	NA	NA	NA	NA	NA	NA	NA	NA	NA	NA	NA	NA	NA	NA	NA
amazonica	7632580	-54.85732	-2.299208	13 August 2017	Brazil	Para	Santarem	https://www.inaturalist.org/observations/7632580	Y	green	Y	N	Y	Y, low water	maroon/green	Y	N	N	Y	NA	Y	N	NA	NA	NA	NA	NA	NA	NA	Y	Y	white (far away)	NA	NA	N	NA
amazonica	18828530	-59.741197	-3.134012	13 August 2018	Brazil	Amazonas	Careiro de Varzea	https://www.inaturalist.org/observations/18828530	Y	green	Y	Y	Y	N	maroon/green	Y	N	N	Y	N	Y	N	NA	NA	NA	NA	NA	NA	NA	Y	NA	NA	Y, spent	pink	N	N
amazonica	40632911	-59.755167	-3.096333	31 July 2016	Brazil	Amazonas	Careiro de Varzea	https://www.inaturalist.org/observations/40632911	Y	green	Y	Y	Y	N	maroon/green	Y	N	N	N	Y	N	N	NA	NA	NA	NA	NA	NA	NA	NA	NA	NA	NA	NA	N	N
amazonica	11952160	-59.845318	-3.05866	30 April 2018	Brazil	Amazonas	Maues	https://www.inaturalist.org/observations/11952160	Y	green	Y	Y	N	N	green/maroon	Y	N	N	N	NA	NA	NA	NA	NA	NA	NA	NA	NA	NA	NA	NA	NA	NA	NA	NA	NA
amazonica	44770752 2 photos, all leaves	-59.850001	-3.067468	26 April 2020	Brazil	Amazonas	Maues	https://www.inaturalist.org/observations/44770752	Y	green	Y	Y	Y	B	green/maroon	Y	N	N	N	NA	NA	NA	NA	NA	NA	NA	NA	NA	NA	NA	NA	NA	NA	NA	NA	NA
amazonica	44544043	-59.849381	-3.070873	26 April 2020	Brazil	Amazonas	Maues	https://www.inaturalist.org/observations/44544043	Y	green	Y	Y	Y	N	maroon/green	Y	N	N	N	NA	NA	NA	NA	NA	NA	NA	NA	NA	NA	NA	NA	NA	NA	NA	NA	NA
amazonica	4249757 2 photos, leaves and habit	-59.897204	-3.070358	9 June 2016	Brazil	Amazonas	Maues	https://www.inaturalist.org/observations/4249757	Y	green	Y and N	Y	N	N	maroon/green	Y	N	N	Y	NA	NA	N	NA	NA	NA	NA	NA	NA	NA	Y	NA	NA	Y	dark pink, far away	N	N
amazonica	50185207	-59.932127	-3.001659	26 October 2019	Brazil	Amazonas	Maues	https://www.inaturalist.org/observations/50185207	Y	green	Y, unfurling	NA	NA	NA	maroon/green	NA	N	N	Y	N	Y, spent	Y 90%	Y	Y	N	regular to irregular	78(86), 64(71)	Y	N	N	N	NA	Y, spent	pink	N	N
amazonica	11884045	-59.939652	-3.00291	8 February 2014	Brazil	Amazonas	Maues	https://www.inaturalist.org/observations/11884045	Y	green	Y	Y	N	N	maroon/green	Y	N	N	Y	N	Y	N, in profile	Y	Y	N	NA	not visible enough	Y	N	Y	N	NA	Y	pink, including slightly darker pink innermost tepals	N	N
amazonica	16512534	-59.941063	-3.006066	11 September 2018	Brazil	Amazonas	Maues	https://www.inaturalist.org/observations/16512534	Y	green	Y and N	Y	N	N	maroon/green	Y	N	N	Y	N (far away)	NA	NA	NA	NA	NA	NA	NA	NA	NA	NA	NA	NA	NA	NA	N	N
amazonica	27909284	-59.940208	-3.007255	29 June 2019	Brazil	Amazonas	Maues	https://www.inaturalist.org/observations/27909284	Y	green	Y and N	Y	N	N	green, maroon on unfurling leaf	Y	N	N	N	Y (far away)	NA	NA	NA	NA	NA	NA	NA	NA	NA	NA	NA	NA	NA	NA	N	N
amazonica	49738977	-59.940394	-3.007239	30 December 2017	Brazil	Amazonas	Maues	https://www.inaturalist.org/observations/49738977	Y	green	Y	Y	N	N	marron/green	Y	N	N	Y	N	Y	N (too far)	NA	NA	NA	NA	NA	NA	NA	Y	Y	white (far away)	NA	NA	N	N
amazonica	36870328 1/3, 2/3	-59.940418	-3.007371	18 October 2019	Brazil	Amazonas	Maues	https://www.inaturalist.org/observations/36870328	N	NA	NA	NA	NA	NA	NA	NA	NA	NA	Y	N	Y	Y (incomplete)	Y	Y	N	regular to irregular	not countable	Y	N	Y	N	NA	Y	pink, dark pink/ innermost tepals dark pink/maroon	N	N
amazonica	36870328 3/3	-59.940418	-3.007371	18 October 2019	Brazil	Amazonas	Maues	https://www.inaturalist.org/observations/36870328	N	NA	NA	NA	NA	NA	NA	NA	NA	NA	Y	N	partial	N, in profile only	Y	Y	N	NA	NA	Y	NA	Y	Maybe beginning of second?	white/turning pink pale	Maybe beginning of second?	white/turning pink pale	N	N
amazonica	11909720	-59.956536	-3.009903	7 December 2017	Brazil	Amazonas	Maues	https://www.inaturalist.org/observations/11909720	Y	green	Y	Y	N	N	green, slightly maroon	Y	N	N	Y	Y	Y spent	N (too far)	NA	NA	NA	NA	NA	NA	NA	Y	NA	NA	probably spent	dark pink	N	N
amazonica	51618250	-60.021731	-3.119027	17 January 2017	Brazil	Amazonas	Maues	https://www.inaturalist.org/observations/51618250	Y	green, bronze tinged	Y and N	Y	N	N	maroon, green	Y	N	N	Y	Y	Y spent	N	NA	NA	NA	NA	NA	NA	NA	NA	NA	NA	Y, spent	dark pink	N	N
amazonica	56829000	-60.038513	-3.101099	20 January 2020	Brazil	Amazonas	Maues	https://www.inaturalist.org/observations/56829000	Y	green	Y	Y	N	N	maroon/green	Y	N	N	N	N	NA	NA	NA	NA	NA	NA	NA	NA	NA	NA	NA	NA	NA	NA	N	N
amazonica	29787728	-59.997447	-3.192778	29 July 2019	Brazil	Amazonas	Iranduba	https://www.inaturalist.org/observations/29787728	Y	green	Y	Y	Y	N	not visible	Y	N	N	N	N	NA	NA	NA	NA	NA	NA	NA	NA	NA	NA	NA	NA	NA	NA	N	N
amazonica	22201090 2 photos, all leaves	-60.003149	-3.215419	11 November 2014	Brazil	Amazonas	Iranduba	https://www.inaturalist.org/observations/22201090	Y	green and bronze tinged (young leaves)	Y abaxial visible, coppery-maroon colour	Y	N	N	maroon.	Y	N	N	N	NA	NA	NA	NA	NA	NA	NA	NA	NA	NA	NA	NA	NA	NA	NA	N	N
amazonica	22144955 1/3, 3/3	-60.025526	-3.2078150	29 September 2018	Brazil	Amazonas	Iranduba	https://www.inaturalist.org/observations/22144955	Y	green and bronze tinged	Y and N	Y	N	N	maroon	Y	N	N	Y	N	N	N	NA	NA	NA	NA	NA	NA	NA	NA	NA	NA	NA	NA	Y	N
amazonica	22144955 2/3	-60.025526	-3.2078150	29 September 2018	Brazil	Amazonas	Iranduba	https://www.inaturalist.org/observations/22144955	N	NA	NA	NA	NA	NA	NA	NA	NA	NA	Y	NA	Y, spent	N	NA	NA	NA	NA	NA	NA	NA	NA	NA	NA	Y, spent, decaying	pink with darker pink innermost tepals	N	N
amazonica	13250517 1/6, 3/6, 5/6	-59.99776	-3.2233	22 May 2018	Brazil	Amazonas	Iranduba	https://www.inaturalist.org/observations/13250517	Y	green	Y	Y	N	N	maroon	Y	N	N	N	NA	NA	NA	NA	NA	NA	NA	NA	NA	NA	NA	NA	NA	NA	NA	NA	NA
amazonica	13250517 2/6, 4/4	-59.99776	-3.2233	22 May 2018	Brazil	Amazonas	Iranduba	https://www.inaturalist.org/observations/13250517	Y	green	Y	Y	N	N	maroon	Y	N	N	Y	N	Y	Y 70% (on spent flower)	Y	Y	N	regular to irregular	98(140), 82(117)	Y	NA	Y	Y	white, with hint of pink shining through centre	Y, spent, decaying	pink	N	N
amazonica	46690161 1, 2 of 5	-60.003891	-3.2275	15 December 2017	Brazil	Amazonas	Iranduba	https://www.inaturalist.org/observations/46690161	Y	green and bronze tinged	Y	Y	N	N	maroon	Y	N	N	Y	Y	Y	Y on bud 90% and 85%, brown in colour	Y	Y	N	regular	153(170), 120(141)	Y	N	Y	N	NA	Y, spent, closing	pink	N	N
amazonica	46690161 3, 4, 5 of 5	-60.003891	-3.2275	15 December 2017	Brazil	Amazonas	Iranduba	https://www.inaturalist.org/observations/46690161	Y	green and bronze	Y and N	Y	Y, dense population	N	maroon	Y	N	N	Y	Y	NA	N	NA	NA	NA	NA	NA	NA	NA	NA	NA	NA	NA	NA	N	N
amazonica	19004119	-60.050729	-3.268442	14 August 2018	Brazil	Amazonas	Iranduba	https://www.inaturalist.org/observations/19004119	Y	green	Y	Y	Y, dense population	N	maroon	Y	N	N	Y	Y	Y	too far	NA	NA	NA	NA	NA	NA	NA	NA	Y	white	NA	NA	N	N
amazonica	37350813	-60.091765	-3.252047	15 December 2010	Brazil	Amazonas	Iranduba	https://www.inaturalist.org/observations/37350813	Y	green	Y	Y	N	N	maroon	Y	N	N	Y	Y	Y, spent	too far	NA	NA	NA	NA	NA	NA	NA	Y	NA	NA	Y, spent	pink	N	N
amazonica	34061547	-60.123172	-3.294003	16 August 2019	Brazil	Amazonas	Iranduba	https://www.inaturalist.org/observations/34061547	Y	green	Y	Y	Y	N	maroon, green	Y	N	N	N	NA	NA	NA	NA	NA	NA	NA	NA	NA	NA	NA	NA	NA	NA	NA	N	N
amazonica	10494779	-60.185644	-3.301105	6 May 2016	Brazil	Amazonas	Iranduba	https://www.inaturalist.org/observations/10494779	Y	green	Y	Y	Y, dense population	N	maroon, green	Y	N	N	Y	Y	N	too far	NA	NA	NA	NA	NA	NA	NA	NA	NA	NA	NA	NA	N	N
amazonica	20537321	-60.187102	-3.287892	30 March 2014	Brazil	Amazonas	Iranduba	https://www.inaturalist.org/observations/20537321	Y	green	Y	N	Y	N	maroon	Y	N	N	N	NA	NA	NA	NA	NA	NA	NA	NA	NA	NA	NA	NA	NA	NA	NA	N	N
amazonica	29478806	-59.858514	-3.266262	12 October 2016	Brazil	Amazonas	Careiro da Varzea	https://www.inaturalist.org/observations/29478806	Y	green, bronze tinged unfurling leaf	Y and N	Y	N	N	maroon	Y	N	N	N	NA	NA	NA	NA	NA	NA	NA	NA	NA	NA	NA	NA	NA	NA	NA	N	N
amazonica	25707022	-59.833482	-3.461615	31 December 2010	Brazil	Amazonas	Careirio	https://www.inaturalist.org/observations/25707022	Y	green	Y and N	Y	Y	N	maroon	Y	N	N	Y	Y	NA	too far	NA	NA	NA	NA	NA	NA	NA	NA	NA	NA	NA	NA	NA	NA
amazonica	13781155	-60.011936	-3.541866	15 January 2010	Brazil	Amazonas	Careirio	https://www.inaturalist.org/observations/13781155	Y	green	Y	N	N	Y, dense population	maroon, green	Y	N	N	Y	NA	Y	too far	NA	NA	NA	NA	NA	NA	NA	NA	NA	NA	Y	pink	NA	NA
amazonica	35238613	-61.850057	-1.772505	23 June 2019	Brazil	Amazonas	Barcelos	https://www.inaturalist.org/observations/35238613	Y	green	Y	Y	N	N	maroon, green	Y	N	N	N	NA	NA	NA	NA	NA	NA	NA	NA	NA	NA	NA	NA	NA	NA	NA	NA	NA
amazonica	47054543	-60.697753	-2.739008	1 June 2014	Brazil	Amazonas	Maues	https://www.inaturalist.org/observations/47054543	Y	green	Y	Y	Y	N	maroon, green	Y	N	N	Y	NA	Y	too far	NA	NA	NA	NA	NA	NA	NA	NA	NA	NA	NA	NA	NA	NA
amazonica	38273109 1/4, 2/4, 4/4	-60.56488	-2.901896	4 April 2010	Brazil	Amazonas	Maues	https://www.inaturalist.org/observations/38273109	Y	green	Y	Y	N	N	maroon	Y	N	N	Y	Y	Y	N	NA	NA	NA	NA	NA	NA	NA	Y	N	NA	Y, starting to flush pink at beginning of second. Very long pedicel!	NA	N	N
amazonica	38273109 3/4	-60.56488	-2.901896	4 April 2010	Brazil	Amazonas	Maues	https://www.inaturalist.org/observations/38273109	Y	green	Y and N, unfurling	N	N	N	maroon	Y	N	N	Y	NA	Y	N	NA	NA	NA	NA	NA	NA	NA	NA	NA	NA	Y, starting to flush pink at beginning of second. Very long pedicel!	NA	N	N
amazonica	17205305	-64.645058	-2.723533	6 December 2017	Brazil	Amazonas	Maraa	https://www.inaturalist.org/observations/17205305	Y	green	Y	Y	N	N	maroon	Y	N	N	Y	N	Y	N	NA	NA	NA	NA	NA	NA	NA	Y, dark maroon inners	N	NA	Y	Y, all but innermost petals open. White except for innermost petals	N	N
amazonica	42986245 1/2	-64.848926	-3.063124	4 July 2005	Brazil	Amazonas	Uarini	https://www.inaturalist.org/observations/42986245	Y	green	Y, unfurling	NA	NA	NA	maroon	NA	NA	NA	NA	NA	NA	NA	NA	NA	NA	NA	NA	NA	NA	NA	NA	NA	NA	NA	N	N
amazonica	30941538	-64.84193	-3.079977	7 July 2016	Brazil	Amazonas	Uarini	https://www.inaturalist.org/observations/30941538	Y	green	Y	Y	N	N	maroon	Y	N	N	Y	Y	N	Y, brown in colour	Y	Y	N	regular	180	Y	N	Y, bud is opening	NA	NA	NA	NA	Y, with persistent inner staminodes	N
amazonica	12617884, 1/4, 2/4, 3/4	-67.11904	-4.488923	1 July 2016	Brazil	Amazonas	Carauari	https://www.inaturalist.org/observations/12617884	Y	dark maroon, green	Y	Y	N	N	maroon	Y	N	N	Y	Y	NA	NA	NA	NA	NA	NA	NA	NA	NA	NA	NA	NA	NA	NA	Y	N
amazonica	12617884 3/4	-67.11904	-4.488923	1 July 2016	Brazil	Amazonas	Carauari	https://www.inaturalist.org/observations/12617884	N	NA	NA	NA	NA	NA	NA	NA	NA	NA	Y	Y	NA	Y, very pink	Y	Y	N	regular to irregular	58	Y but sparse towards tips	NA	N	NA	NA	NA	NA	N	N
amazonica	6373562	-69.900513	-4.2259	31 May 2014	Brazil	Amazonas	Sao Sebastiao doUatuma	https://www.inaturalist.org/observations/6373562	Y	green, bronze tinges on juvenile	Y and N	Y	N	N	maroon	Y	N	N	N	NA	NA	NA	NA	NA	NA	NA	NA	NA	NA	NA	NA	NA	NA	NA	N	N
amazonica	20802253 2 photos, same flower	-69.927998	-4.289593	20 November 2018	Brazil	Amazonas	Benjamin Constant	https://www.inaturalist.org/observations/20802253	Y	green, bronze on juvenile leaf	Y	Y	N	N	maroon	Y	N	N	Y	Y	Y	Y, partial on bud	Y	Y	N	regular	too blurry to count	Y	N	Y	Y	white with red inners showing through	N	NA	N	N
amazonica	21262099	-69.935907	-4.203165	13 March 2019	Colombia	Amazonas	Leticia	https://www.inaturalist.org/observations/21262099	Y	green	Y and N	Y	N	N	maroon	Y	N	N	N	NA	NA	NA	NA	NA	NA	NA	NA	NA	NA	NA	NA	NA	NA	NA	N	N
amazonica	26111456	-69.942595	-4.197528	27 May 2019	Colombia	Amazonas	Leticia	https://www.inaturalist.org/observations/26111456	Y	green, bronze on smaller leaf	Y and N	Y	N	N	maroon	Y	N	N	Y	N	Y	N	NA	NA	NA	NA	NA	NA	NA	Y	Y	white, too far away	NA	NA	N	N
amazonica	37212476	-69.943078	-4.21292	16 October 2019	Colombia	Amazonas	Leticia	https://www.inaturalist.org/observations/37212476	Y	green	Y cultivated	Y	N	N	maroon	Y	N	N	N	NA	NA	NA	NA	NA	NA	NA	NA	NA	NA	NA	NA	NA	NA	NA	N	N
amazonica	10546880 1/2	-69.975528	-4.179212	29 March 2018	Colombia	Amazonas	Leticia	https://www.inaturalist.org/observations/10546880	Y	green	Y	Y	N	N	maroon	Y	N	N	Y	N	Y	N	NA	NA	NA	NA	NA	NA	NA	Y	Y	white with pink glowing from inside	NA	NA	N	N
amazonica	10546880 2/2	-69.975528	-4.179212	29 March 2018	Colombia	Amazonas	Leticia	https://www.inaturalist.org/observations/10546880	Y	green	Y	Y	N	N	maroon	Y	N	N	Y	N	Y	N	NA	NA	NA	NA	NA	NA	NA	NA	Y	white (from further distance)	NA	NA	N	N
amazonica	19442883	-69.993355	-4.165763	3 January 2019	Colombia	Amazonas	Leticia	https://www.inaturalist.org/observations/19442883	Y	green, and maroon-tinged	N	N	N	N	maroon	Y	NA	NA	Y	Y	NA	too far	NA	NA	NA	NA	NA	NA	NA	Y	Y	white (too far)	NA	NA	N	N
amazonica	33111156	-70.017257	-4.1801	10 November 2018	Peru	Loreto	Mariscal Ramon Castilla	https://www.inaturalist.org/observations/33111156	Y	green, and maroon-tinged younger leaf	Y and N	Y	N	N	maroon	Y	N	N	Y	Y	Y	Y too far	NA	NA	NA	NA	NA	NA	NA	Y, dark maroon	Y or second	white with dark innermost	Y or first	white except for inner petals, dark pink/magenta	N	N
amazonica	26017905	-70.073629	-4.16216	27 May 2019	Peru	Loreto	Mariscal Ramon Castilla	https://www.inaturalist.org/observations/26017905	N	green	Y	Y	N	N	maroon	Y	N	N	Y	N	Y	N	NA	NA	NA	NA	NA	NA	NA	Y	N	NA	Y	early stage of opening. White except for inner petals, dark pink/magenta	N	N
amazonica	19505602 identifcal photo to 20802253	-70.060944	-14.1465	17 November 2018	Peru	Loreto	Mariscal Ramon Castillo	https://www.inaturalist.org/observations/19505602	Y	NA	Y	Y	N	N	maroon	Y	NA	NA	Y	Y	NA	Y	Y	Y	NA	NA	NA	Y	NA	Y	Y	white with red inners showing through	N	NA	N	N
amazonica	51747676	-70.063887	-4.142199	17 July 2016	Peru	Loreto	Mariscal Ramon Castillo	https://www.inaturalist.org/observations/51747676	y	green, and bronze younger leaves	Y and N	Y	N	N	maroon	Y	N	N	Y	N	Y	N	NA	NA	NA	NA	NA	NA	NA	Y	Y	white (too far)	spent flowers, pink	pink spent	Y	N
amazonica	22241172 4 photos, all leaves	-70.056853	-4.110197	20 September 2017	Peru	Loreto	Mariscal Ramon Castilla	https://www.inaturalist.org/observations/22241172	Y	green	Y and N	Y	N	N	maroon	Y	N	N	N	Y	NA	too far	NA	NA	NA	NA	NA	NA	NA	NA	NA	NA	NA	NA	N	N
amazonica	13654259	-70.208708	-4.31636	21 November 2017	Peru	Loreto	Mariscal Ramon Castilla	https://www.inaturalist.org/observations/13654259	Y	green	Y	Y	N	N	maroon	Y	N	N	Y	N	Y	N	NA	NA	NA	NA	NA	NA	NA	Y	Y	white	NA	NA	N	N
amazonica	39279556 2 photos, all leaves	-70.205832	-3.865026	24 November 2019	Colombia	Amazonas	Leticia	https://www.inaturalist.org/observations/39279556	Y	green	Y and N	Y	N	N	maroon	Y	N	N	N	N	NA	NA	NA	NA	NA	NA	NA	NA	NA	NA	NA	NA	NA	NA	Y	N
amazonica	23067255	-70.255695	-3.81027	16 August 2016	Colombia	Amazonas	Leticia	https://www.inaturalist.org/observations/23067255	y	green	Y and N	Y	N	N	maroon/green	Y	N	N	Y	N	Y	N	NA	NA	NA	NA	NA	NA	NA	Y	N	NA	Y	white except for inner petals, dark pink/magenta	N	N
amazonica	18327780	-70.297685	-3.810987	22 January 2010	Colombia	Amazonas	Puerto-Narino	https://www.inaturalist.org/observations/18327780	Y	green	Y	Y	Y, dense population	N	maroon	Y	N	N	Y	Y	Y	N	NA	NA	NA	NA	NA	NA	NA	Y	Y	white (too far)	N	NA	N	N
amazonica	58907430	-70.355642	-3.788867	27 May 2015	Colombia	Amazonas	Puerto Narino	https://www.inaturalist.org/observations/58907430	Y	green	Y	Y	Y, dense population	N	maroon	Y	N	N	Y	N	Y	N	NA	NA	NA	NA	NA	NA	NA	Y	Y	white (too far)	NA	NA	N	N
amazonica	20853375 4 photos, all leaves	-70.346869	-3.812669	20 January 2019	Peru	Loreto	Mariscal Ramon Castilla	https://www.inaturalist.org/observations/20853375	Y	green, and bronze tinged young leaf	Y	Y	N	N	maroon	Y	N	N	N	N	NA	NA	NA	NA	NA	NA	NA	NA	NA	NA	NA	NA	NA	NA	N	N
amazonica	10236407	-72.515478	-3.473687	25 June 2017	Peru	Loreto	Maynas	https://www.inaturalist.org/observations/10236407	Y	green	N	N	N	N	NA	N	N	N	Y	N	Y	N	NA	NA	NA	NA	NA	NA	NA	Y	Y	white with dark inners visible	N	NA	N	N
amazonica	4101345	-72.765488	-3.348924	16 May 2011	Peru	Loreto	Maynas	https://www.inaturalist.org/observations/4101345	y	green	Y	Y	N	N	maroon	Y	N	N	Y	N	Y	N	NA	NA	NA	NA	NA	NA	NA	Y	N	NA	Y	white, pink glowing from inner, just opening	N	N
amazonica	821386	-72.844849	-3.444883	13 July 2014	Peru	Loreto	Maynas	https://www.inaturalist.org/observations/821386	Y	green	Y and N	Y	N	N	maroon	Y	N	N	Y	Y	Y	N too far away	NA	NA	NA	NA	NA	NA	NA	Y	Y	white (too far away)	Y	deep pink	N	N
amazonica	16366927	-72.869884	-3.461312	14 July 2001	Peru	Loreto	Maynas	https://www.inaturalist.org/observations/16366927	Y	green	Y	Y	N	N	maroon	Y	N	N	N	NA	NA	NA	NA	NA	NA	NA	NA	NA	NA	NA	NA	NA	NA	NA	N	N
amazonica	835181 3 photos, 1 young leaf, 3 bud and leaf, 4 habit with bud	-72.861328	-3.529869	13 July 2014	peru	Loreto	Maynas	https://www.inaturalist.org/observations/835181	Y	green	Y	Y	N	N	maroon	Y	N	N	Y	Y	N	Y, brown colour	Y	Y	N	NA	too far to count	Y	N	NA	NA	NA	NA	NA	N	N
amazonica	14688494	-73.040403	-3.551092	1 May 2017	Peru	Loreto	Maynas	https://www.inaturalist.org/observations/14688494	Y	green, bronze tinged younger	Y	Y	N	N	maroon	Y	N	N	Y	Y	Y	Y	Y	Y	N	NA	too far to count	NA	NA	Y	Y	white (far away)	NA	NA	N	N
amazonica	57510649	-73.130705	-3.624705	2 Septembe 2018	peru	Loreto	Maynas	https://www.inaturalist.org/observations/57510649	Y	green, bronze tinged younger	Y and N	Y	N	N	maroon	Y	N	N	N	NA	NA	NA	NA	NA	NA	NA	NA	NA	NA	NA	NA	NA	NA	NA	N	N
amazonica	3683800	-73.016999	-3.491679	8 July 2016	Peru	Loreto	Maynas	https://www.inaturalist.org/observations/3683800	Y	green, bronze tinged younger	Yand N	Y	N	N	maroon	Y	N	N	Y	Y	Y	N too far away	NA	NA	NA	NA	NA	NA	NA	Y	Y	white (too far)	NA	NA	N	N
amazonica	18857631	-73.062	-3.51	14 July 2018	Peru	Loreto	Maynas	https://www.inaturalist.org/observations/18857631	Y	green	Y	Y	N	N	maroon	Y	N	N	Y	N	Y	N	NA	NA	NA	NA	NA	NA	NA	Y	Y	white, some red visible inner	NA	NA	N	N
amazonica	7193201 2 photos, habit and closer	-73.117709	-3.564369	4 January 2017	Peru	Loreto	Maynas	https://www.inaturalist.org/observations/7193201	Y	green, bronze tinged younger	Y and N	Y	N	N	maroon	Y	N	N	Y	Y	Y	Y	Y	Y	NA	NA	too far	too far	NA	Y	Y	white (far away)	NA	NA	N	NA
amazonica	50636039	-73.132088	-3.606303	28 July 2016	Peru	Loreto	Maynas	https://www.inaturalist.org/observations/50636039	Y	green, bronze younger	Y and N	Y	N	N	maroon	Y	N	N	Y	Y	Y, multiple	too far	NA	NA	NA	NA	NA	NA	NA	Y	Y	white (far away)	Y	dark inners, white outer petals	N	N
amazonica	31466499	-73.316049	-3.752315	29 July 2019	Peru	Loreto	Maynas	https://www.inaturalist.org/observations/31466499	Y	green	Y and N, mostly N	Y	N	N	maroon	Y	N	N	N	NA	NA	NA	NA	NA	NA	NA	NA	NA	NA	NA	NA	NA	NA	NA	NA	NA
amazonica	44866058	-73.335022	-4.119948	1 July 2010	Peru	Loreto	Maynas	https://www.inaturalist.org/observations/44866058	Y	green	Y	Y	Y	N	maroon	Y	N	N	N	NA	NA	NA	NA	NA	NA	NA	NA	NA	NA	NA	NA	NA	NA	NA	N	N
amazonica	32659562	-73.199947	-4.186663	13 March 2017	Peru	Loreto	Maynas	https://www.inaturalist.org/observations/32659562	Y	green	Y	Y	N	N	maroon	Y	N	N	Y	N	Y	N	NA	NA	NA	NA	NA	NA	NA	Y	Y	white (far away)	NA	NA	N	N
amazonica	45373341	-73.39193	-4.264329	15 February 2020	Peru	Loreto	Loreto	https://www.inaturalist.org/observations/45373341	Y	green	Y	Y	N	N	maroon	Y	N	N	Y	N	Y, spent	Y	Y	Y	NA	NA	too blurry	too far	NA	Y	N	NA	spent flower	moderate to dark pink	Y	N
amazonica	35679795 1/7, 2/7, 7/7	-73.348568	-4.263766	14 May 2008	Peru	Loreto	Maynas	https://www.inaturalist.org/observations/35679795	Y	green	Y	Y	Y	N	maroon	Y	N	N	N	NA	NA	NA	NA	NA	NA	NA	NA	NA	NA	NA	NA	NA	NA	NA	N	N
amazonica	35679795 3/7, 4/7, 5/7, 6/7	-73.348568	-4.263766	14 May 2008	Peru	Loreto	Maynas	https://www.inaturalist.org/observations/35679795	N	NA	NA	NA	NA	NA	NA	NA	NA	NA	Y	N	Y, spent	Y, 20%, 30%	Y	Y	N	regular	66(330), 90(300)	Y	N	Y	NA	NA	spent flower, decaying; beetle present	pink, deep pink/marron inners	N	N
amazonica	42857333	-73.318778	-4.303537	14 January 2019	Peru	Loreto	Maynas	https://www.inaturalist.org/observations/42857333	Y	green	Y and N	Y	N	N	maroon	Y	N	N	N	NA	NA	NA	NA	NA	NA	NA	NA	NA	NA	NA	NA	NA	NA	NA	N	N
amazonica	9675454	-73.28265	-4.298399	15 June 2014	Peru	Loreto	Maynas	https://www.inaturalist.org/observations/9675454	Y	green	Y	Y	N	N	maroon	Y	N	N	N	NA	NA	NA	NA	NA	NA	NA	NA	NA	NA	NA	NA	NA	NA	NA	N	N
amazonica	128022	-73.26442	-4.326718	22 July 2005	Peru	Loreto	Maynas	https://www.inaturalist.org/observations/128022	Y	green	Y and N	Y	N	N	maroon	Y	N	N	Y	Y	NA	Y	Y	Y	NA	NA	too far	too far	NA	NA	NA	NA	spent, petals decaying	NA	N	N
amazonica	41477934	-73.419998	-4.513739	13 January 2020	Peru	Loreto	Requena	https://www.inaturalist.org/observations/41477934	Y	green	Y	Y	N	N	maroon	Y	N	N	Y	N	NA	N	NA	NA	NA	NA	NA	NA	NA	too far	NA	NA	NA	NA	N	N
amazonica	44128190	-73.429417	-4.529185	21 January 2018	Peru	Loreto	Requena	https://www.inaturalist.org/observations/44128190	Y	green	Y and N, unfurling	Y	N	N	maroon	Y	N	N	N	NA	NA	NA	NA	NA	NA	NA	NA	NA	NA	NA	NA	NA	NA	NA	N	N
amazonica	54312531 2 photos, same but closer	-73.454127	-4.529635	21 November 2020	Peru	Loreto	Requena	https://www.inaturalist.org/observations/54312531	Y	green	Y	Y	Y, dense population	N	maroon	Y	N	N	Y	N	Y	N	NA	NA	NA	NA	NA	NA	NA	Y	NA	NA	Y, early	white with faint pink glow from inner	N	N
amazonica	62183827	-73.452788	-4.512862	16 November 2017	Peru	Loreto	Requena	https://www.inaturalist.org/observations/62183827	Y	green	Y	Y	N	N	maroon	Y, bowl-shaped in very congested areas, coming out of water	N	N	Y	N	Y	N	NA	NA	NA	NA	NA	NA	NA	Y	NA	NA	Y	pink with darker inners; very pale staminodes	N	N
amazonica	19421939	-73.539508	-4.49316	11 February 2014	Peru	Loreto	Loreto	https://www.inaturalist.org/observations/19421939	Y	green	Y	Y	N	N	maroon	Y	N	N	N	NA	NA	NA	NA	NA	NA	NA	NA	NA	NA	NA	NA	NA	NA	NA	N	N
amazonica	7354070	-73.626277	-4.556509	29 July 2017	Peru	Loreto	Loreto	https://www.inaturalist.org/observations/7354070	Y	green	Y and N	Y	N	N	maroon	Y	N	N	Y	Y too far	Y too far	N	NA	NA	NA	NA	NA	NA	NA	NA	NA	NA	NA	NA	N	N
amazonica	24415081	-73.644312	-4.609328	28 April 2019	Peru	Loreto	Loreto	https://www.inaturalist.org/observations/24415081	Y	green	Y	Y	N	N	maroon or pale maroon-green	Y	N	N	N	NA	NA	NA	NA	NA	NA	NA	NA	NA	NA	NA	NA	NA	NA	NA	N	N
amazonica	43258612	-73.555847	-4.667159	3 Octobe 2002	Peru	Loreto	Requena	https://www.inaturalist.org/observations/43258612	Y	green	Y	Y	Y	N	maroon or maroon-green	Y	N	N	Y	Y too far	N	NA	NA	NA	NA	NA	NA	NA	NA	NA	NA	NA	NA	NA	N	N
amazonica	7736153 4 photos, all leaves	-73.564539	-4.692089	11 March 2016	Peru	Loreto	Requena	https://www.inaturalist.org/observations/7736153	Y	green	Y	Y	N	N	maroon	Y	N	N	N	NA	NA	NA	NA	NA	NA	NA	NA	NA	NA	NA	NA	NA	NA	NA	N	N
amazonica	7736136	-73.598313	-4.690977	10 March 2016	peru	Loreto	Requena	https://www.inaturalist.org/observations/7736136	Y	green	Y	Y	NA	NA	maroon	Y	N	N	N	NA	NA	NA	NA	NA	NA	NA	NA	NA	NA	NA	NA	NA	NA	NA	N	N
amazonica	19541409	-74.38	-5.05	29 April 2004	Peru	Loreto	Loreto	https://www.inaturalist.org/observations/19541409	Y	green	Y	Y	Y	N	maroon	Y	N	N	Y	Y too far	NA	NA	NA	NA	NA	NA	NA	NA	NA	NA	NA	NA	NA	NA	N	N
amazonica	39408977	-75.442657	-5.2063	14 June 2007	Peru	Loreto	Loreto	https://www.inaturalist.org/observations/39408977	Y	green	Y	Y	N	N	maroon	Y	N	N	N	NA	NA	NA	NA	NA	NA	NA	NA	NA	NA	NA	NA	NA	NA	NA	N	n
amazonica	5074735	-74.172133	-2.294842	11 August 2016	Peru	Loreto	Maynas	https://www.inaturalist.org/observations/5074735	Y	green	Y	Y	N	N	maroon	Y	N	N	Y	Y	N	Y, brown colour	Y	Y	N	NA	NA	Y	NA	NA	NA	NA	NA	NA	N	N
amazonica	61086794 1/2	-72.818525	-7.600695	27 September 2020	Brazil	Acre	Mancio Lima	https://www.inaturalist.org/observations/61086794	Y	green, bronze tinged younger	Y and N	Y	Y	N	maroon	Y	N	N	N	NA	NA	NA	NA	NA	NA	NA	NA	NA	NA	NA	NA	NA	NA	NA	N	N
amazonica	35378749 1/2	-72.690425	-7.647397	27 December 2012	Brazil	Acre	Cruzeiro do Sul	https://www.inaturalist.org/observations/35378749	Y	green	Y	Y	N	N	maroon	Y	N	N	Y	N	Y	N	NA	NA	NA	NA	NA	NA	NA	Y	Y	white	NA	NA	N	N
amazonica	21152434 1/3, 3/3	-72.578998	-7.736687	3 February 2009	Brazil	Acre	Cruzeiro do Sul	https://www.inaturalist.org/observations/21152434	Y	green	Y and N	Y	N	N	maroon	Y	N	N	Y	NA	Y	N	NA	NA	NA	NA	NA	NA	NA	NA	Y	white, mostly closed	NA	NA	NA	NA
amazonica	33785950	-72.568611	-7.760556	21 September 2019	Brazil	Acre	Cruzeiro do Sul	https://www.inaturalist.org/observations/33785950	Y	green	Y and N	Y	N	N	maroon	Y	N	N	Y	N	Y	N	NA	NA	NA	NA	NA	NA	NA	Y	NA	NA	Y, early	white - far away	N	N
amazonica	33411887	-72.562992	-7.764506	21 September 2019	Brazil	Acre	Cruzeiro do Sul	https://www.inaturalist.org/observations/33411887	Y	green	Y andN	Y	N	N	NA	Y	N	N	N	NA	NA	NA	NA	NA	NA	NA	NA	NA	NA	NA	NA	NA	NA	NA	N	N
amazonica	59978746 1/3, 2/3	-72.555623	-7.755204	28 November 2019	Brazil	Acre	Cruzeiro do Sul	https://www.inaturalist.org/observations/59978746	Y	green, also abaxial: bronze/olive green/maroon	Y	Y	N	N	maroon	Y	N	N	N	NA	NA	NA	NA	NA	NA	NA	NA	NA	NA	NA	NA	NA	NA	NA	N	N
amazonica	33824102	-72.552134	-7.750067	3 October 2019	Brazil	Acre	Cruzeiro do Sul	https://www.inaturalist.org/observations/33824102	Y	green, bronze tinged young leaf	Y and N	Y	N	N	maroon	Y	N	N	Y	N	Ytoo far	NA	NA	NA	NA	NA	NA	NA	NA	NA	NA	NA	NA	NA	N	N
amazonica	33513251 3 photos, leaves and habit, flowers far	-72.550535	-7.745338	21 September 2019	Brazil	Acre	Cruzeiro do Sul	https://www.inaturalist.org/observations/33513251	Y	green	Y and N	Y	N	N	maroon	Y	N	N	Y	NA	Y too far	NA	NA	NA	NA	NA	NA	NA	NA	NA	NA	NA	NA	NA	N	N
amazonica	34224087	-72.553563	-7.743627	21 September 2019	Brazil	Acre	Cruzeiro do Sul	https://www.inaturalist.org/observations/34224087	Y	green	Y and N, mostly N	Y	N	N	maroon	Y	N	N	Y	NA	Y too far	NA	NA	NA	NA	NA	NA	NA	NA	NA	NA	NA	NA	NA	N	N
sp nov boliviana	67432069 5 photos, all leaves	-64.904	-14.816134	29 December 2020	Bolivia	El Beni	Trinidad	https://www.inaturalist.org/observations/67432069	Y	green	Y	N	Y	Y	maroon and pale green	Y	Y	Y sometimes	Y	Y too far	N	NA	NA	NA	NA	NA	NA	NA	NA	NA	NA	NA	NA	NA	N	N
mattogrossensis	40363312	-56.776397	-17.3623	4 August 2019	Brazil	Mato Grosso	Porto Jofre	https://www.inaturalist.org/observations/40363312	Y	green, maroon veins	none- juvenile leaf	N	N	N	NA	NA	NA	NA	N	N	NA	NA	NA	NA	NA	NA	NA	NA	NA	NA	NA	NA	NA	NA	N	N
mattogrossensis	40360114 2 photos, all leaves	-56.775967	-17.363878	4 August 2019	Brazil	Mato Grosso	Porto Jofre	https://www.inaturalist.org/observations/40360114	y	green	Y	Y	Y	N	green to pale maroon	N	Y	N	N	NA	NA	NA	NA	NA	NA	NA	NA	NA	NA	NA	NA	NA	NA	NA	N	N
mattogrossensis	40360115	-56.775883	-17.363572	4 August 2019 4 photos	Brazil	Mato Grosso	Porto Jofre	https://www.inaturalist.org/observations/40360115	Y	green	Y, young expanding	Y	Y	N	green to pale maroon, dark maroon	N	Y	N	N	NA	NA	NA	NA	NA	NA	NA	NA	NA	NA	NA	NA	NA	NA	NA	N	N
mattogrossensis	40360116	-56.77594	-17.363778	4 August 2019 3 photos	Brazil	Mato Grosso	Porto Jofre	https://www.inaturalist.org/observations/40360116	Y	green	Y, young expanding	Y	Y	N	green to pale maroon	N	Y	N	N	N	NA	NA	NA	NA	NA	NA	NA	NA	NA	NA	NA	NA	NA	NA	N	N
mattogrossensis	40360126	-56.77608	-17.363468	4 August 2019 2 photos	Brazil	Mato Grosso	Porto Jofre	https://www.inaturalist.org/observations/40360126	Y	green	Y, young expanding	Y	Y	N	green to pale maroon	NA	N	N	N	NA	NA	NA	NA	NA	NA	NA	NA	NA	NA	NA	NA	NA	NA	NA	N	N
mattogrossensis	40360124 3 photos, same flower	-56.776017	-17.363553	4 August 2019	Brazil	Mato Grosso	Porto Jofre	https://www.inaturalist.org/observations/40360124	Y	green	Y	Y	N	N	dark maroon	N	Y	N	Y	N	Y	N	NA	NA	NA	NA	NA	NA	NA	Y	Y	white	NA	NA	N	N
mattogrossensis	8217338	-56.776232	-17.63335	30 August 2017	Brazil	Mato Grosso	Porto Jofre	https://www.inaturalist.org/observations/8217338	Y	green	Y	Y	Y	N	pale maroon	N	Y	N	Y	N	Y	N	NA	NA	NA	NA	NA	NA	NA	Y	N	NA	Y	white with very pale pink at base and centre	N	N
mattogrossensis	8475313	-56.7762	-17.363298	31 August 2017	Brazil	Mato Grosso	Porto Jofre	https://www.inaturalist.org/observations/8475313	Y	green	young unfurling	NA	NA	NA	green to very pale red	NA	NA	NA	NA	NA	NA	NA	NA	NA	NA	NA	NA	NA	NA	NA	NA	NA	NA	NA	N	N
mattogrossensis	7559115 1/4, 2/4	-56.776203	-17.363788	15 August 2017	Brazil	Mato Grosso	Porto Jofre	https://www.inaturalist.org/observations/7559115	Y	green	Y	Y	Y	N	maroon	N	Y	N	N	Y	NA	NA	NA	NA	NA	NA	NA	NA	NA	NA	NA	NA	NA	NA	N	N
mattogrossensis	22693198 2 photos	-56.773131	-17.364933	15 July 2017	Brazil	Mato Grosso	Porto Jofre	https/www.inaturalist.org/observations/22693198	Y	green	Y	Y	Y	N	green to pale maroon/red	N	Y	N	Y	N	Y	N	NA	NA	NA	NA	NA	NA	NA	Y	N	NA	Y	white, very pale pink at base of petals	N	N
mattogrossensis	30940933	-56.77617	-17.363668	25 July 2017	Brazil	Mato Grosso	Porto Jofre	https://www.inaturalist.org/observations/30940933	Y	green	Y	Y	Y	N	green to pale maroon/red	N	Y	N	N	NA	NA	NA	NA	NA	NA	NA	NA	NA	NA	NA	NA	NA	NA	NA	N	N
mattogrossensis	8705900	-56.776458	-17.36205	1 September 2017	Brazil	Mato Grosso	Porto Jofre	https://www.inaturalist.org/observations/8705900	Y	green	Y	Y	Y	N	green to pale maroon/red	N	Y	N	Y	N	Y	Y	Y	Y	N	regular	not countable, very densely packed	N	Y	Y	N	NA	Y, spent/closing	white, pale pink; sepals green	N	N
mattogrossensis	25627078	-57.432597	-17.655786	27 August 2019	Brazil	Mato Grosso	Pocone	https://www.inaturalist.org/observations/25627078	Y	green	Y	Y	Y	N	maroon	N	Y	N	Y	N	Y	N	NA	NA	NA	NA	NA	NA	NA	Y	N	NA	Y, spent/closing	white, pale pink	N	N
mattogrossensis	25627081	-57.432597	-17.655786	27 August 2015	Brazil	Mato Grosso	Pocone	https://www.inaturalist.org/observations/25627081	Y	green	Y	Y	Y	N	maroon	N	Y	N	N	N	NA	NA	NA	NA	NA	NA	NA	NA	NA	NA	NA	NA	NA	NA	N	N
amazonica	70239327	-59.35512	3.663073	7 January 2013	Guyana	Upper Takutu-Upper Esssequibo	Upper Takutu-Upper Esssequibo	https://www.inaturalist.org/observations/70239327	Y	green	Y and N - very low	Y	N	N	maroon	Y	N	N	Y	Y	Y	Y, brown colour	Y	Y	N	regular	NA	NA	NA	Y	N	NA	Y	Y, pink and marroon inner, white outer	N	N
amazonica	67206405 1/4	-59.295251	3.747129	3 March 2019	Guyana	Yakarinta - Surama, UT	Upper Takutu-Upper Esssequibo	https://www.inaturalist.org/observations/67206405	Y	green	Y	Y	Y, dense population	Y, dense population	maroon	Y	N	N	Y	Y	Y	Y, brown colour	Y	NA	NA	NA	NA	NA	NA	N	Y	white	Y	NA	N	N
amazonica	70363817	-58.767702	3.860997	27 February 2021	Guyana	Upper Takutu-Upper Essequibo	Upper Takutu-Upper Essequibo	https://www.inaturalist.org/observations/70363817	Y	green	Y and N	Y	N	N	maroon	Y	N	N	Y	Y	Y	N	NA	NA	NA	NA	NA	NA	NA	Y	N	NA	Y	pink and maroon inner, white outer	N	N
boliviana	95116295	-65.396808	-13.768498	12 September 2021	Bolivia	NA	Yacuma, El Beni	https://www.inaturalist.org/observations/95116295	Y	green	Y	Y	Y	N	pale maroon and white	N	Y	N	Y	N	Y	N	NA	NA	NA	NA	NA	NA	NA	Y	Y	white	N	NA	N	N
amazonica	69675238	-65.67977	-11.115003	15 February 2021	Bolivia	El Beni	Vaca Diez	https://www.inaturalist.org/observations/69675238	Y	green	Y and N	Y	N	N	pale maroon	Y	N	N	N	NA	NA	NA	NA	NA	NA	NA	NA	NA	NA	NA	NA	NA	NA	NA	N	N
amazonica	69689941	-65.679922	-11.114414	15 February 2021	Bolivia	El Beni	Vaca Diez	https://www.inaturalist.org/observations/69689941	Y	green	Y	Y	Y, dense population	N	green and pale maroon	Y	N	N	N	NA	NA	NA	NA	NA	NA	NA	NA	NA	NA	NA	NA	NA	NA	NA	N	N
amazonica	21152434 2/3	-72.578998	-7.736687	3 February 2009	Brazil	Acre	Cruzeiro do Su	https://www.inaturalist.org/observations/21152434	N	NA	NA	NA	NA	NA	NA	NA	NA	NA	Y	Y L.S. maroon innermost tepals	Y	partial	Y	Y	NA	NA	NA	Y	NA	Y	Y	white	N	NA	Y, L.S.	Y in fruit
amazonica	35378749 2/2	-72.690425	-7.647397	27 December 2012	Brazil	Acre	Cruzeiro do Sul	https://www.inaturalist.org/observations/35378749	Y	abaxial maroon, ribs yellow to maroon	not visible	NA	NA	NA	NA	NA	NA	NA	N	NA	NA	NA	NA	NA	NA	NA	NA	NA	NA	NA	NA	NA	NA	NA	NA	NA
amazonica	59978746 3/3	-72.555623	-7.755204	28 November 2019	Bazil	Acre	Cruzeiro do Sul	https://www.inaturalist.org/observations/59978746	NA	green	Y	Y	N	N	maroon	Y	N	N	Y	N	NA	Y partial	Y	not visible	NA	NA	NA	NA	NA	N	N	NA	Y, early	white, flushing pink	N	N
amazonica	61086794 2/2	-72.818525	-7.600695	27 September 2020	Brazil	Acre	Mancio Lima	https://www.inaturalist.org/observations/61086794	Y	green	Y and N	Y	N	N	maroon	Y	N	N	Y	N	Y	N	NA	NA	NA	NA	NA	NA	NA	N	Y	white	NA	NA	N	N
amazonica	67206405 2/4, 3/4	-59.295251	3.747129	3 March 2019	Guyana	Yakarinta - Surama, UT	Upper Takutu-Upper Esssequibo	https://www.inaturalist.org/observations/67206405	Y	green	Y	Y	N	N	maroon	Y	N	N	Y	N	Y	N	NA	NA	NA	NA	NA	NA	NA	N	Y	white	N	NA	N	N
amazonica	67206405 4/4	-59.295251	3.747129	3 March 2019	Guyana	Yakarinta - Surama, UT	Upper Takutu-Upper Esssequibo	https://www.inaturalist.org/observations/67206405	Y	green	Y	N	Y	N	maroon	Y	N	N	Y	N	Y	N	NA	NA	NA	NA	NA	NA	NA	Y	N	NA	Y	pink with darker maroon inners, lighter pink outers	N	N
mattogrossensis	7559115 3/4	-56.776203	-17.363788	15 August 2017	Brazil	Mato Grosso	Porto Jofre	https://www.inaturalist.org/observations/7559115	Y	green	Y	N	Y	N	maroon	N	Y	Y	Y	Y	Y	Y	Y?	too far	NA	NA	NA	NA	NA	Y	Y	white	maybe	early second night, white	N	N
mattogrossensis	7559115 4/4	-56.776203	-17.363788	15 August 2017	Brazil	Mato Grosso	Porto Jofre	https://www.inaturalist.org/observations/7559115	Y	green	Y	N	Y	N	maroon	N	Y	Y	Y	N	Y	N	N	NA	NA	NA	NA	NA	NA	Y	Y	white	maybe	early second night, white	N	N
amazonica	42986245 2/2	-64.848926	-3.063124	4 July 2005	Brazil	Amazonas	Uarini	https://www.inaturalist.org/observations/42986245	N	NA	NA	NA	NA	NA	NA	NA	NA	NA	Y	N	Y	N	NA	NA	NA	NA	NA	NA	NA	Y dark maroon	N	NA	Y	all white, innermost tepals dark pink/magenta, outer staminodes white with dark tips	N	N
